# Supplementary material for: Stereoselective domino azidation and [3 + 2] cycloaddition: a facile route to chiral heterocyclic scaffolds from carbohydrate derived synthons
Source: Royal Society of Chemistry journal article supplement (doi:10.1039/c3ra45363d), 2013-12-20
Supplement: c3ra45363d.pdf [file c3ra45363d.pdf]

## Supporting Information

# STEREOSELECTIVE DOMINO AZIDATION AND [3+2] CYCLOADDITION: A FACILE ROUTE TO CHIRAL HETEROCYCLIC SCAFFOLDS FROM CARBOHYDRATE DERIVED SYNTHONS

Debleena Bhattacharya,<sup>a</sup> Abhijit Ghorai,<sup>a</sup> Uttam Pal,<sup>b</sup> Nakul Chandra Maiti<sup>b</sup> and  
Partha Chattopadhyay<sup>\*, a</sup>

<sup>a</sup>Chemistry Division

<sup>b</sup>Structural Biology & Bioinformatics Division

CSIR-Indian Institute of Chemical Biology,

Kolkata-700032

Fax: +91-33-24735197; E-mail: [partha@iicb.res.in](mailto:partha@iicb.res.in)

### <sup>1</sup>H NMR spectrum of compound 3a:

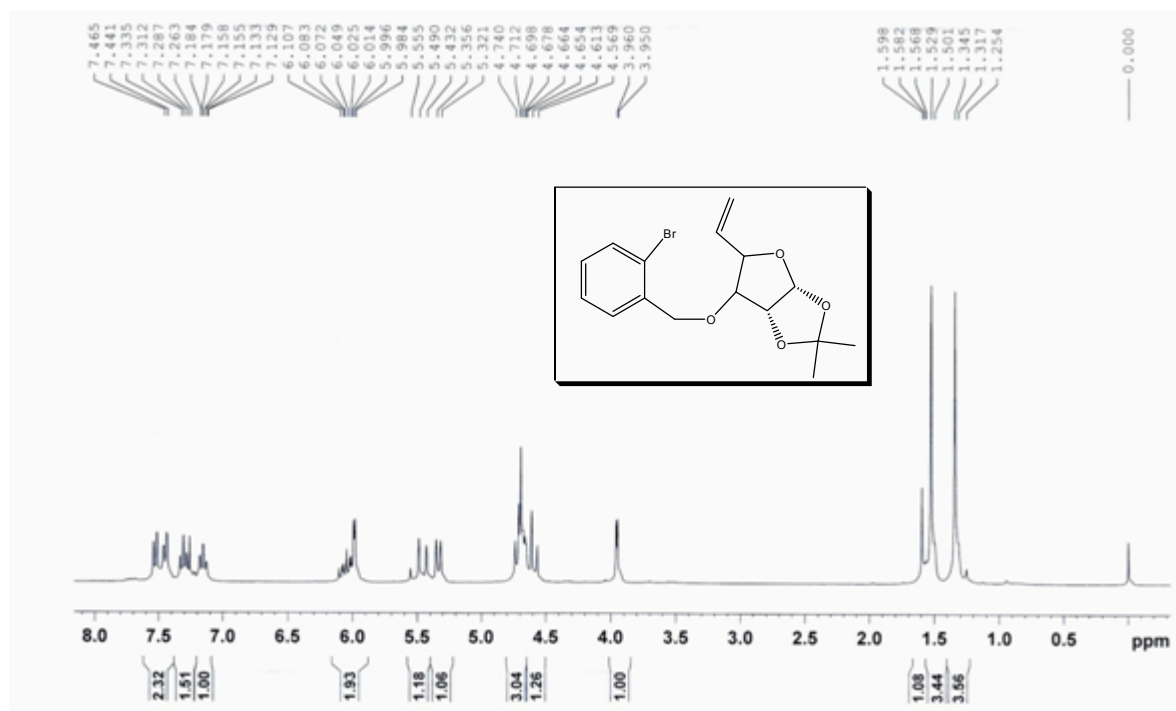

### <sup>13</sup>C NMR spectrum of compound 3a:

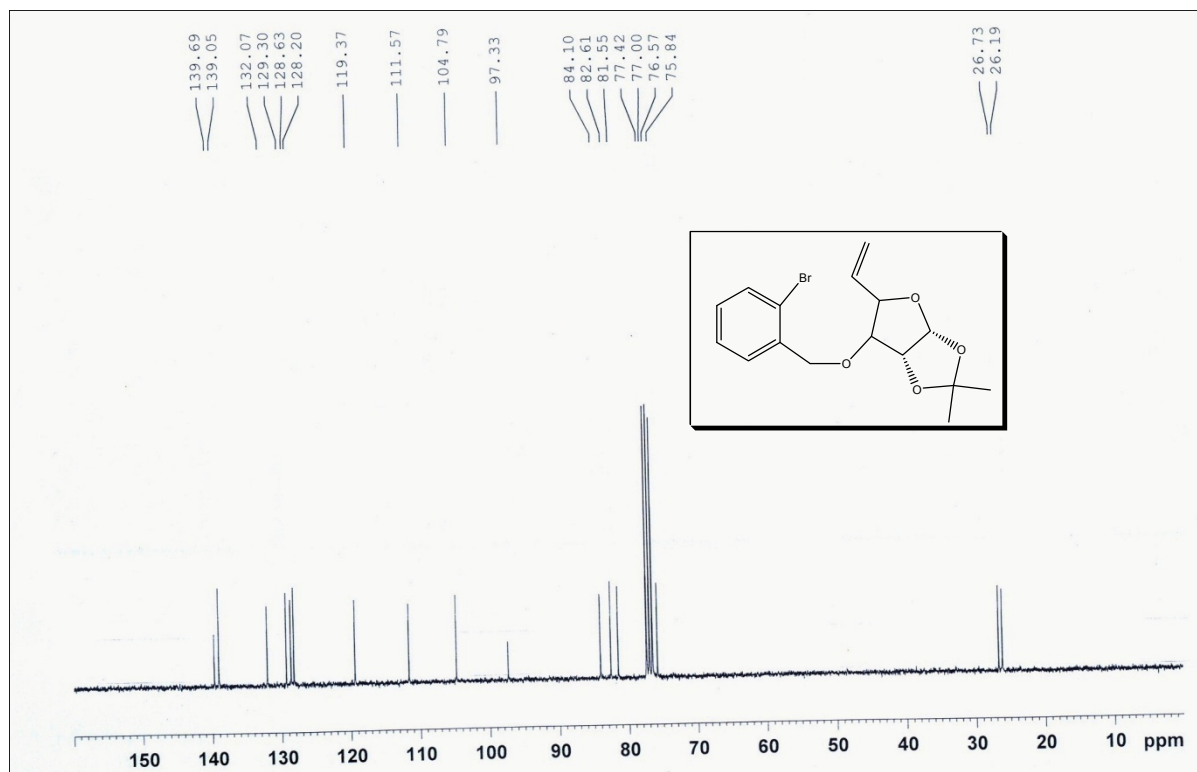

### <sup>1</sup>H NMR spectrum of compound 3b:

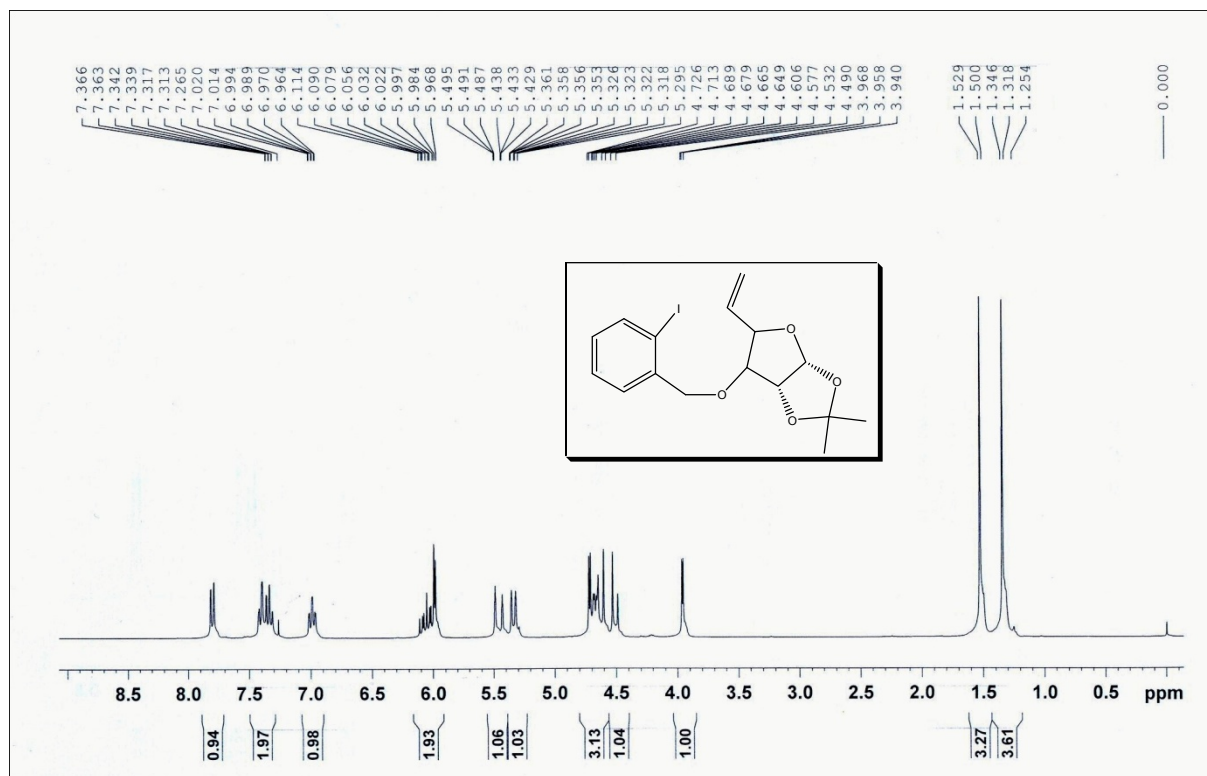

### <sup>13</sup>C NMR spectrum of compound 3b:

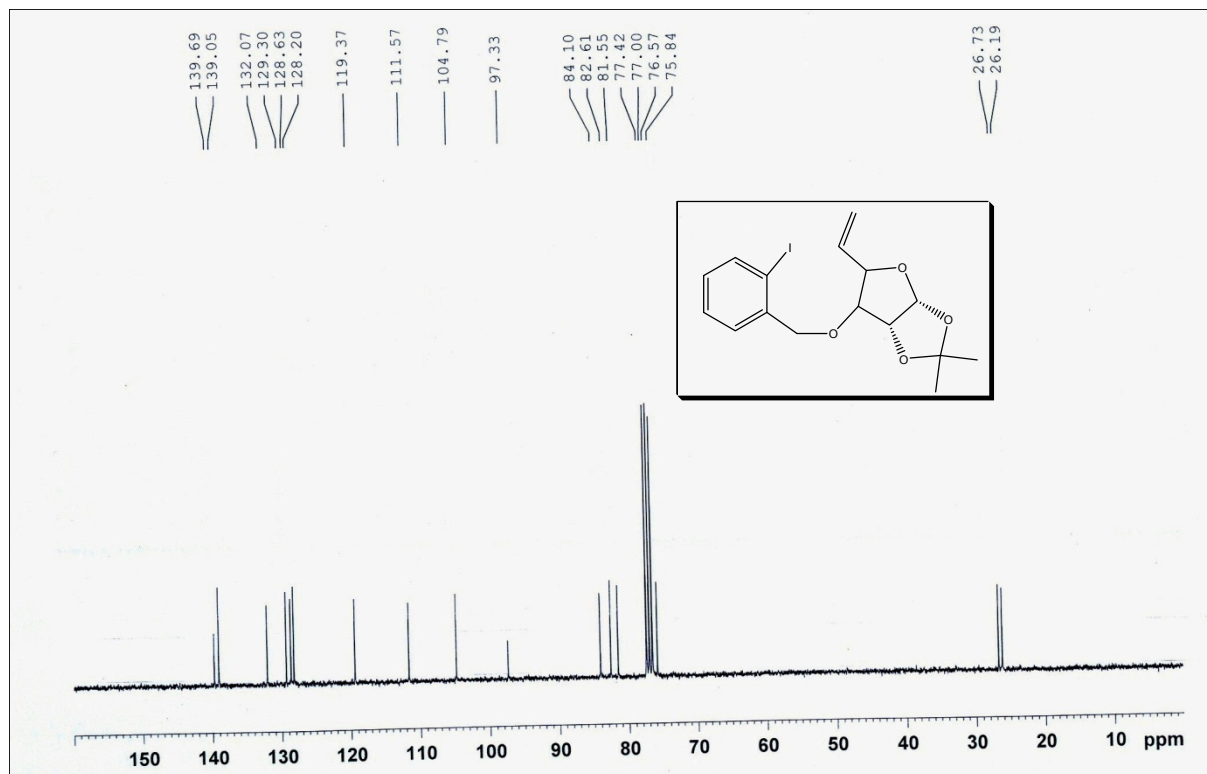

### <sup>1</sup>H NMR spectrum of compound 3c:

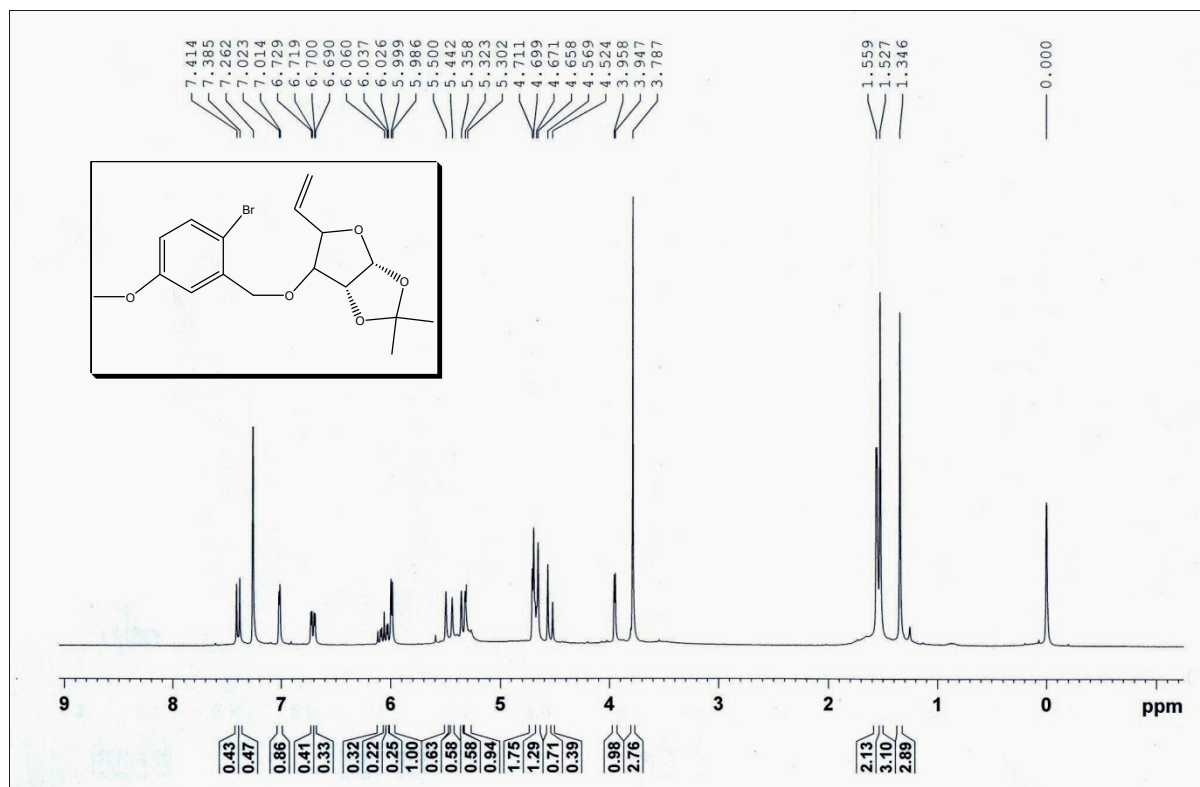

### <sup>13</sup>C NMR spectrum of compound 3c:

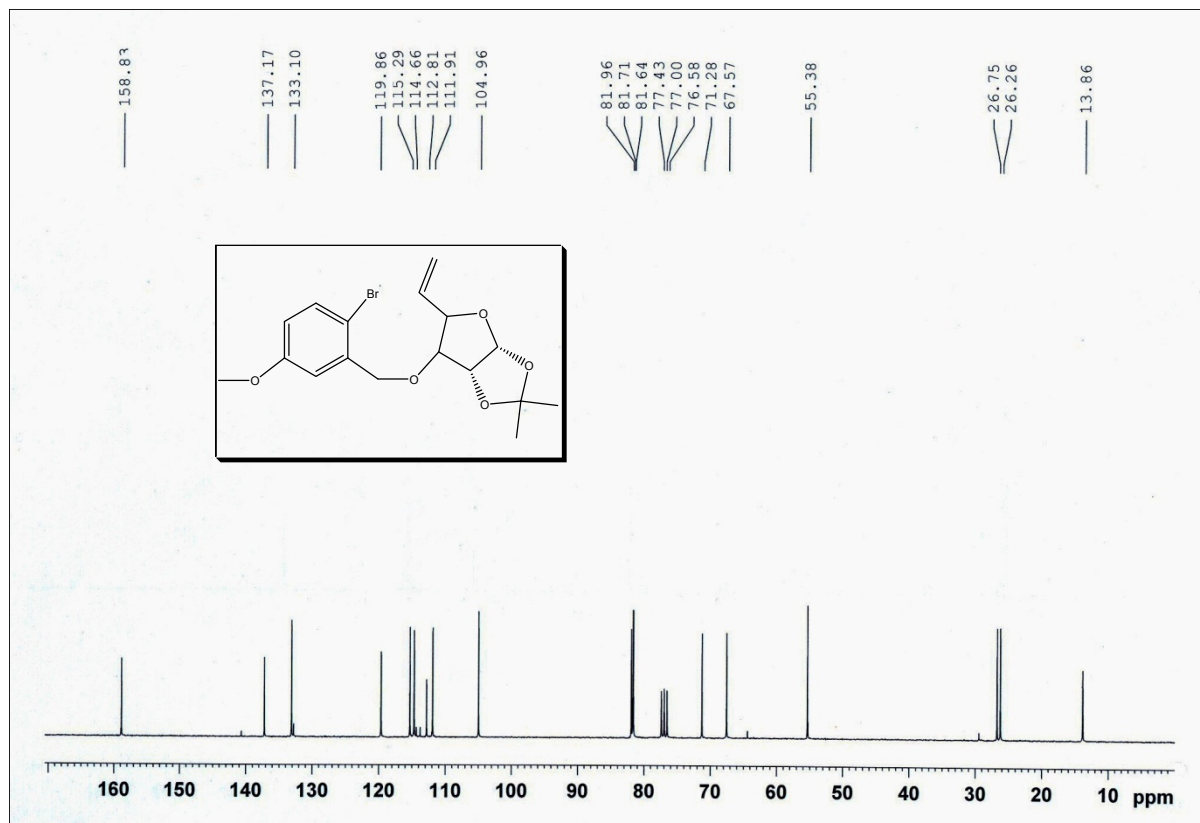

### <sup>1</sup>H NMR spectrum of compound 3d:

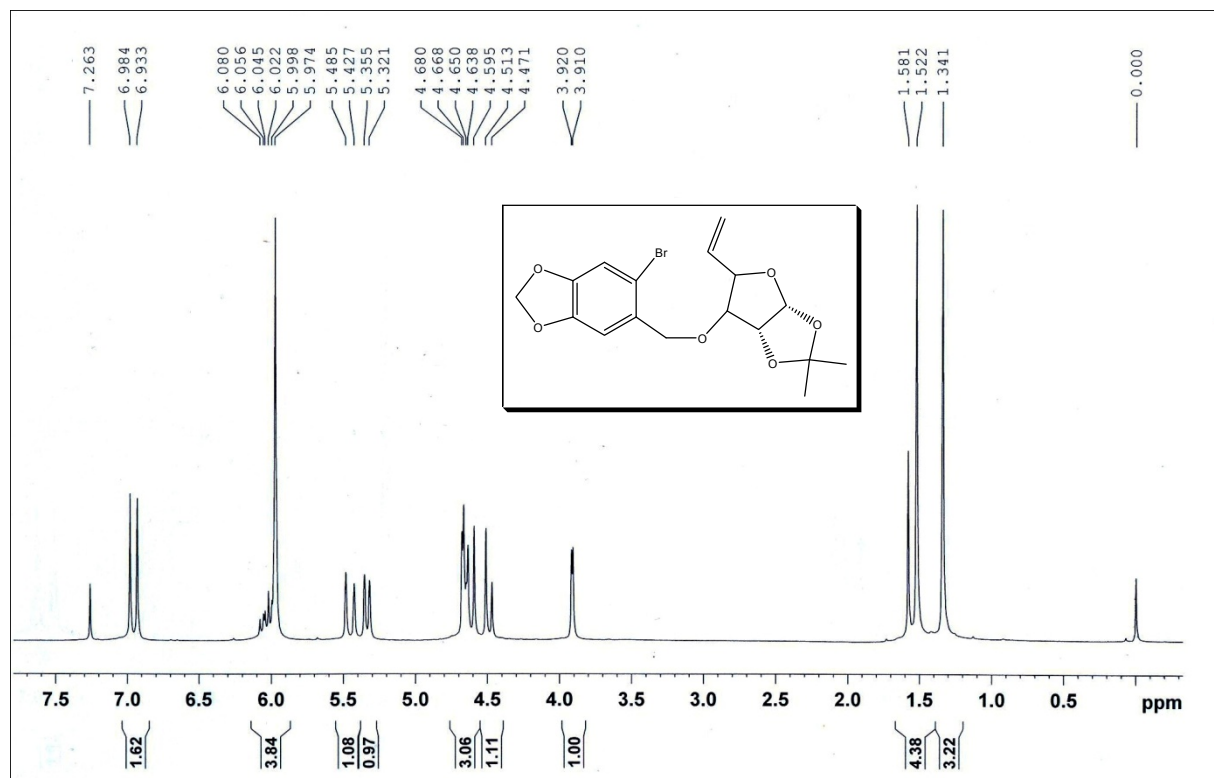

### <sup>13</sup>C NMR spectrum of compound 3d:

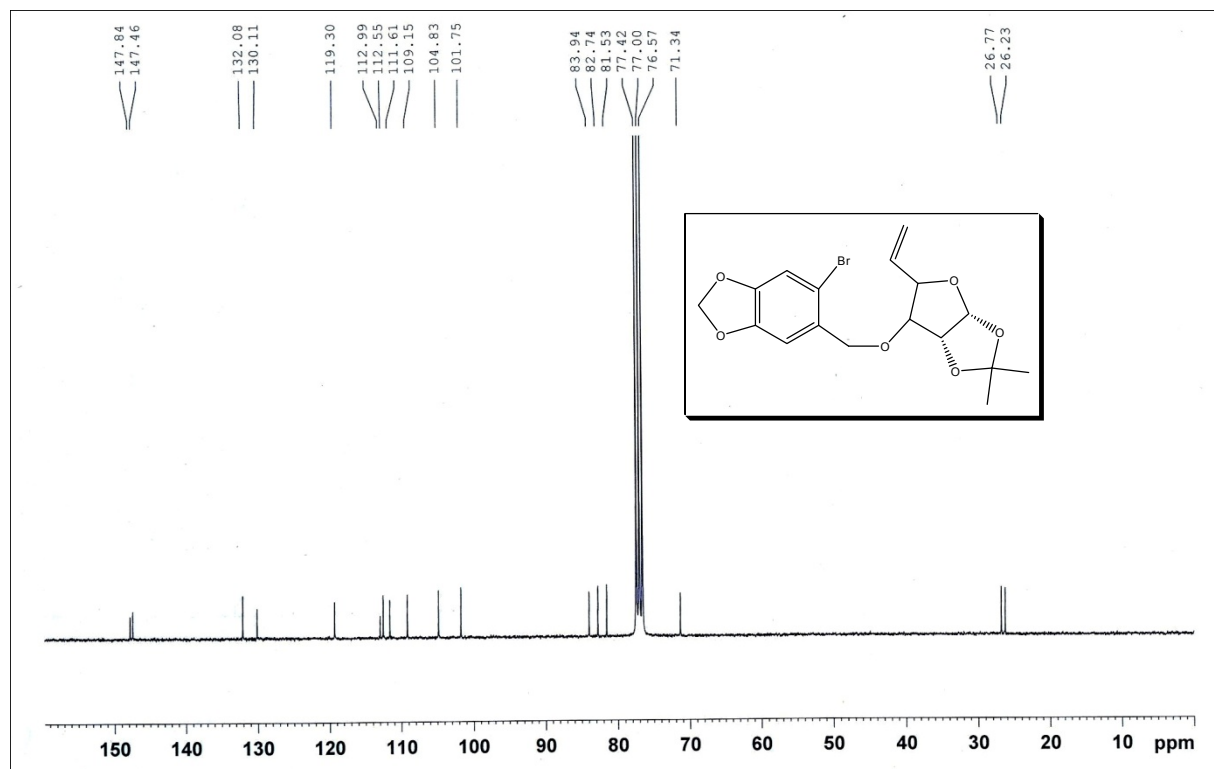

### <sup>1</sup>H NMR spectrum of compound 5a:

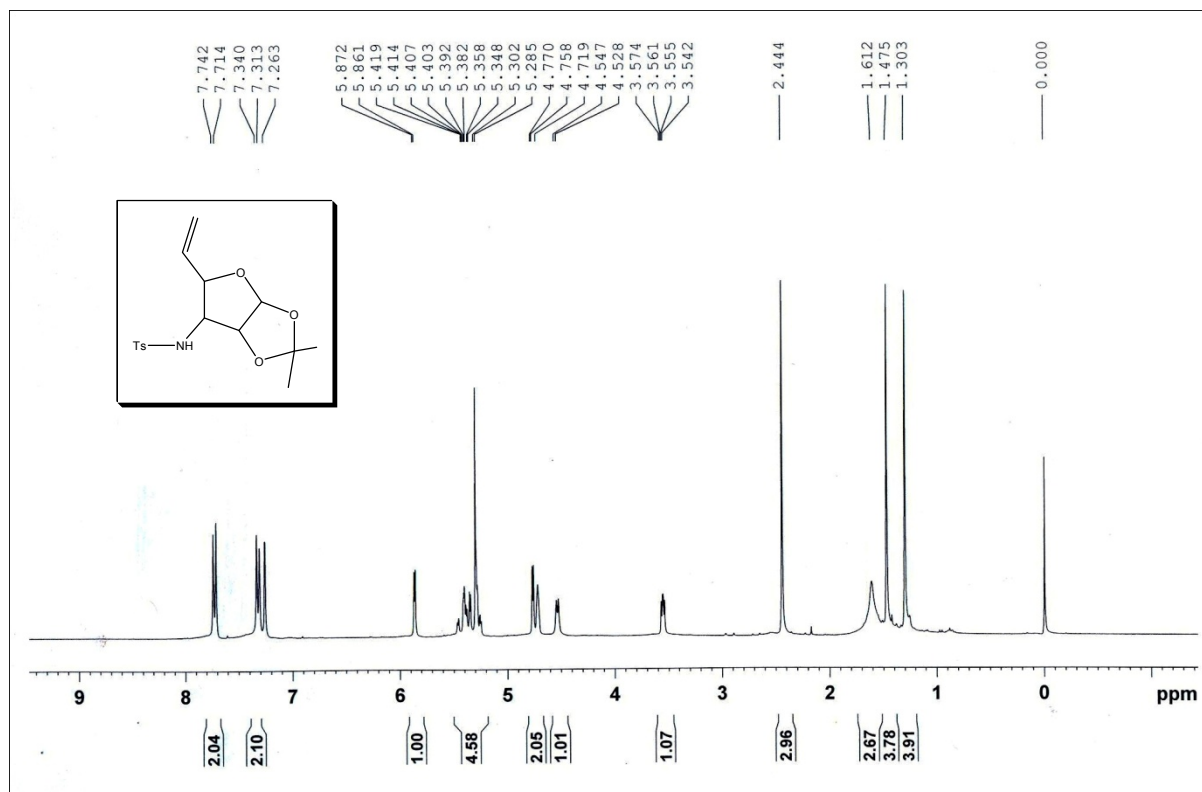

### <sup>13</sup>C NMR spectrum of compound 5a:

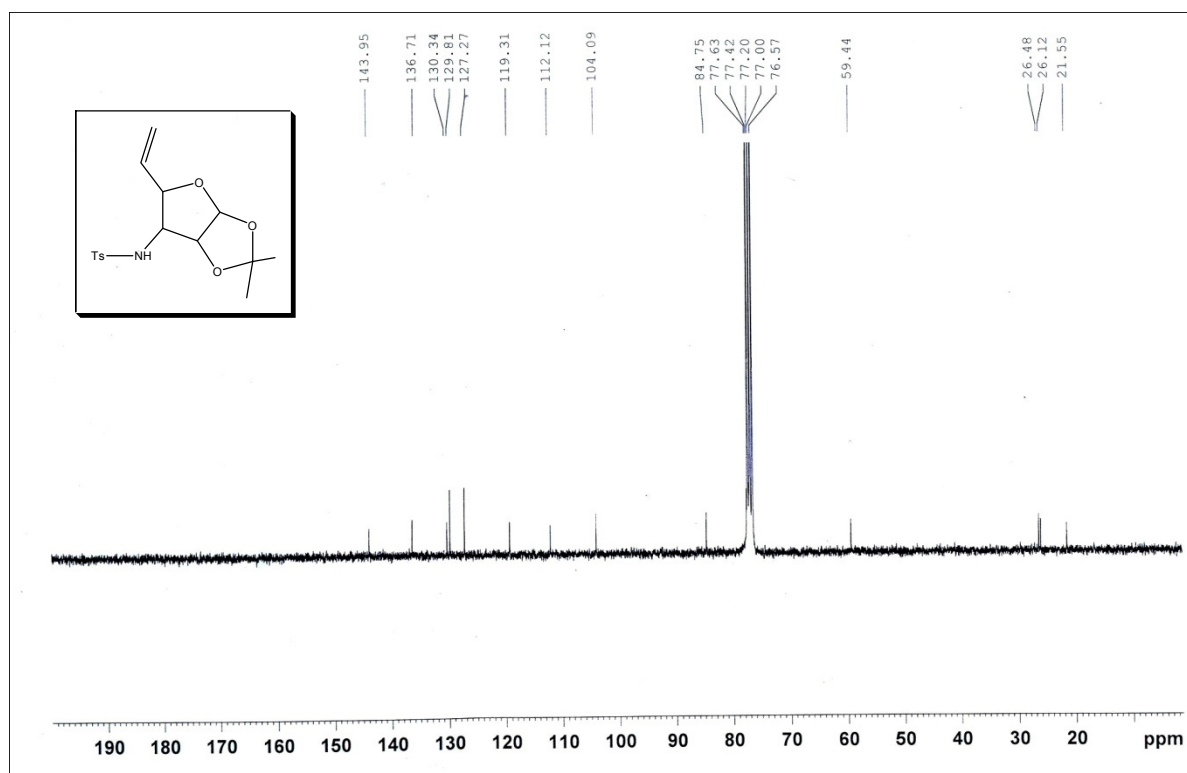

### <sup>1</sup>H NMR spectrum of compound 5b:

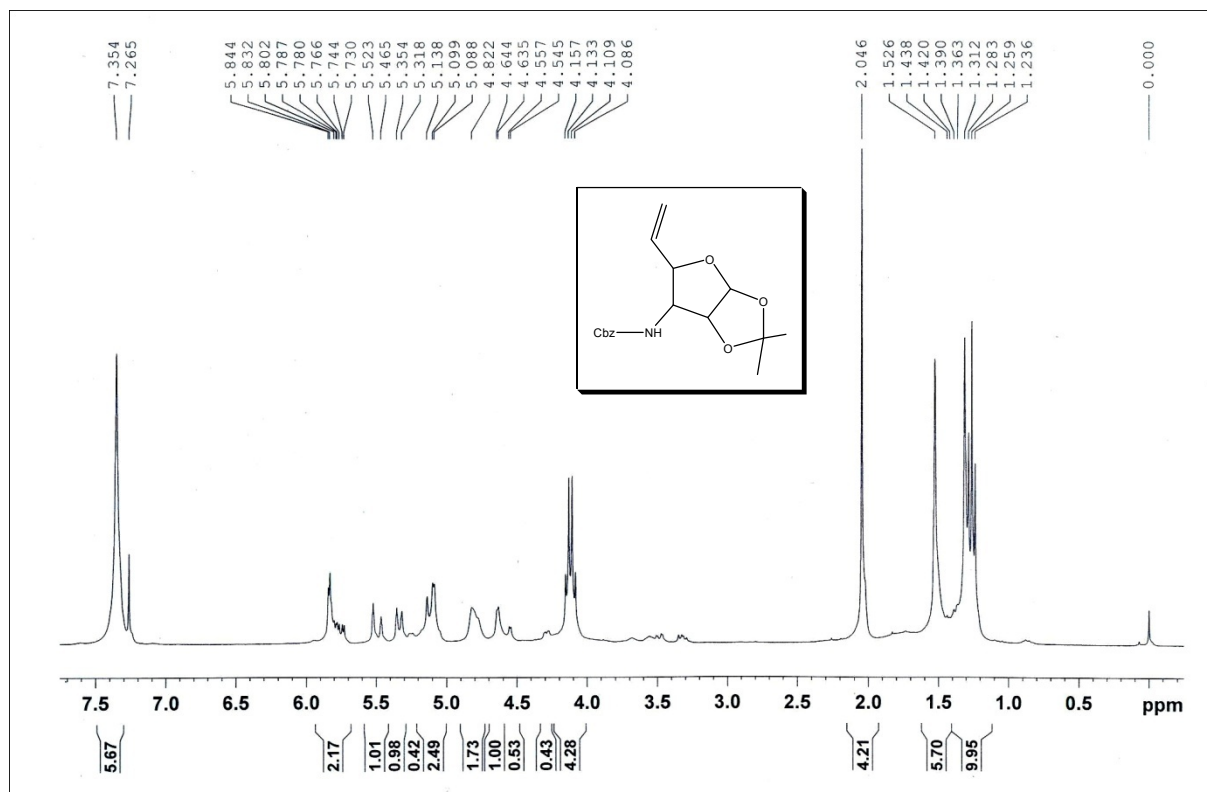

### <sup>13</sup>C NMR spectrum spectra of compound 5b:

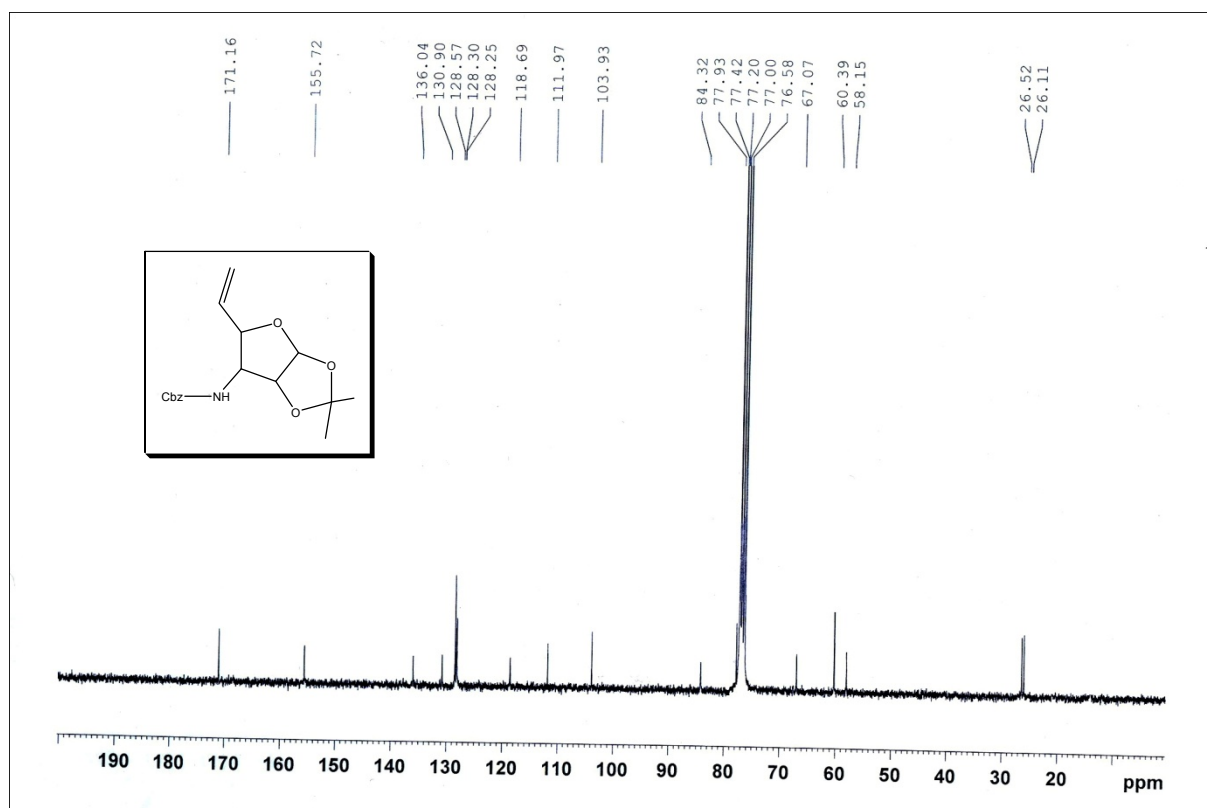

### <sup>1</sup>H NMR spectrum of compound 6a:

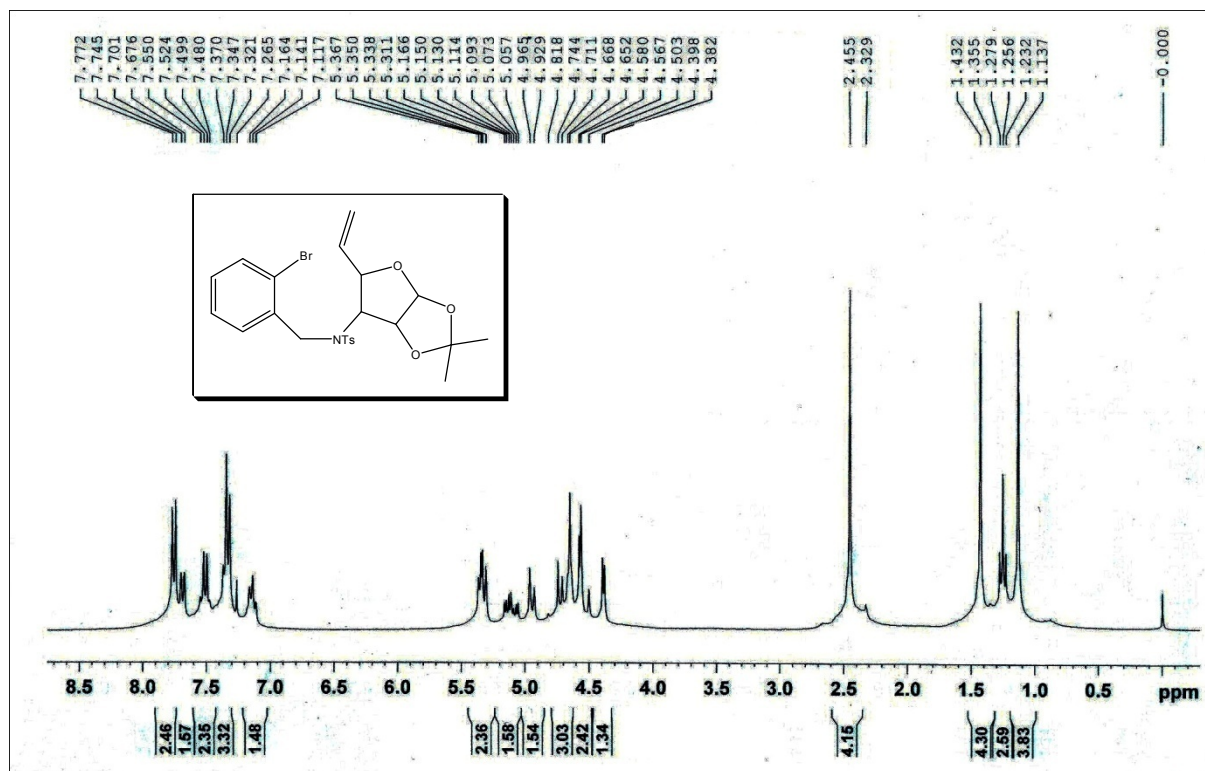

### <sup>13</sup>C NMR spectrum of compound 6b:

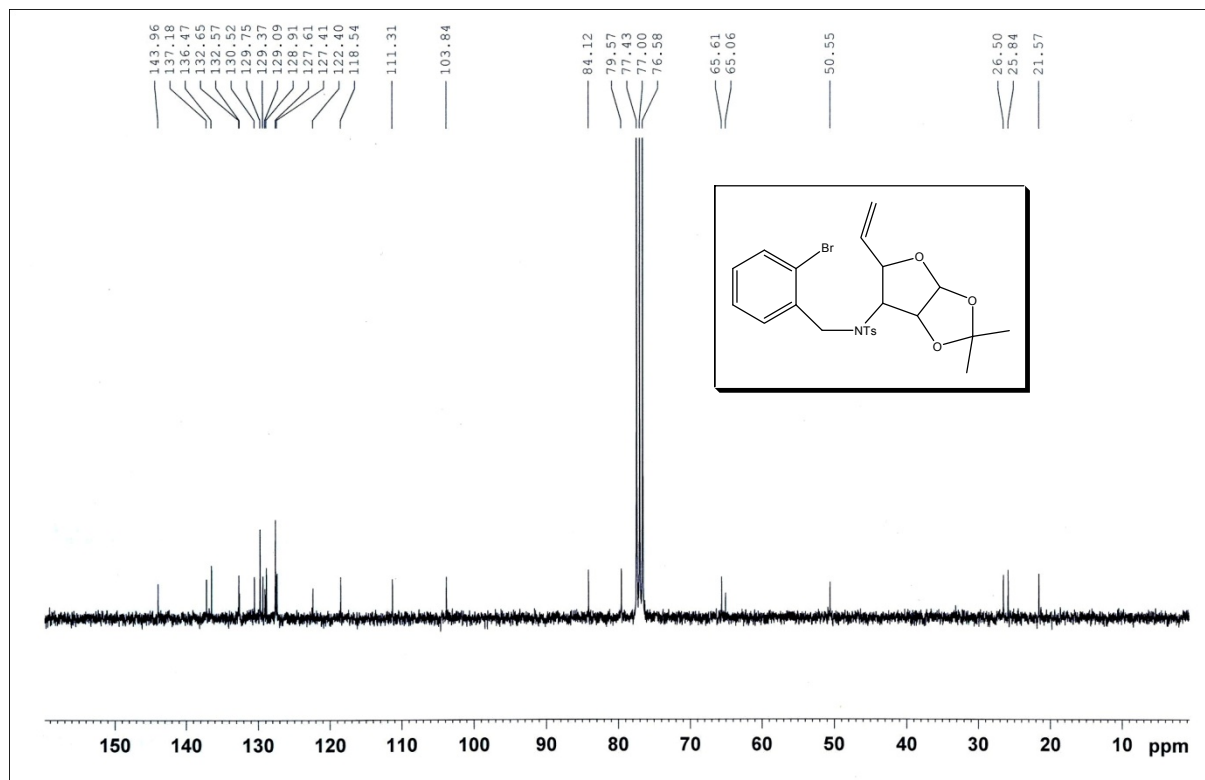



### <sup>1</sup>H NMR spectrum of compound 6b:

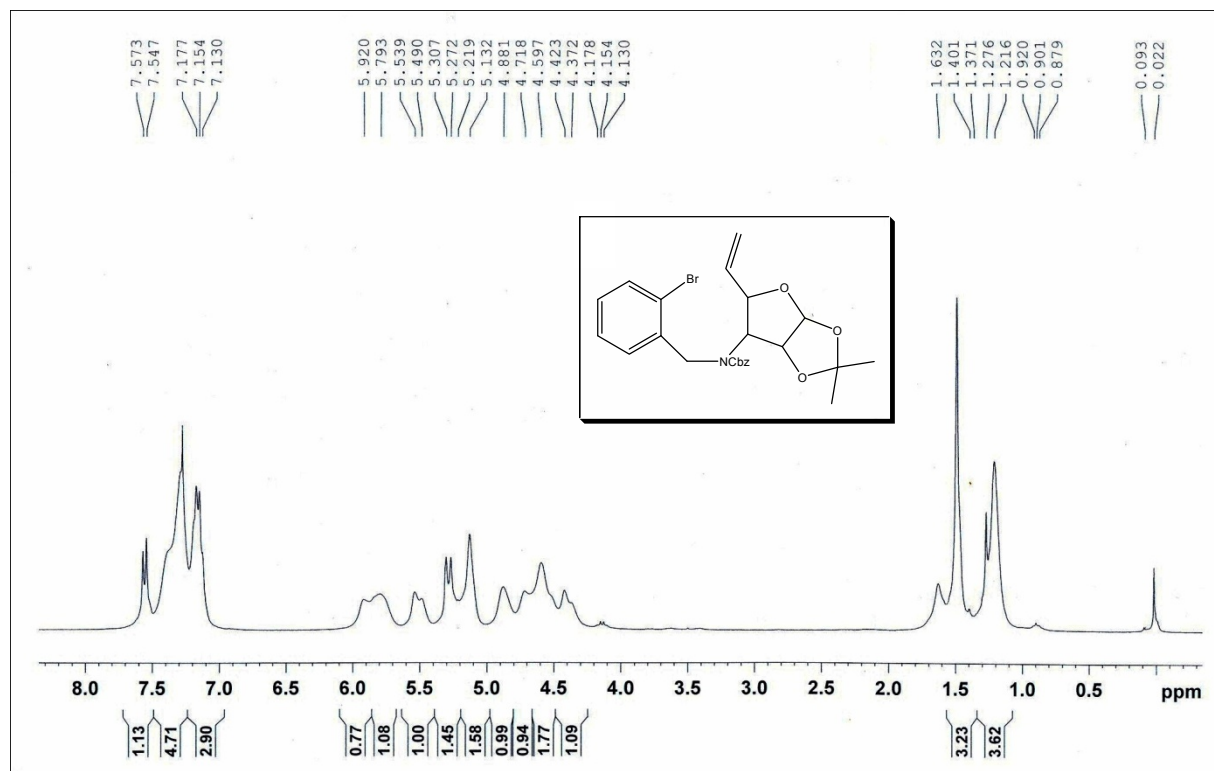

### <sup>13</sup>C NMR spectrum of compound 6b:

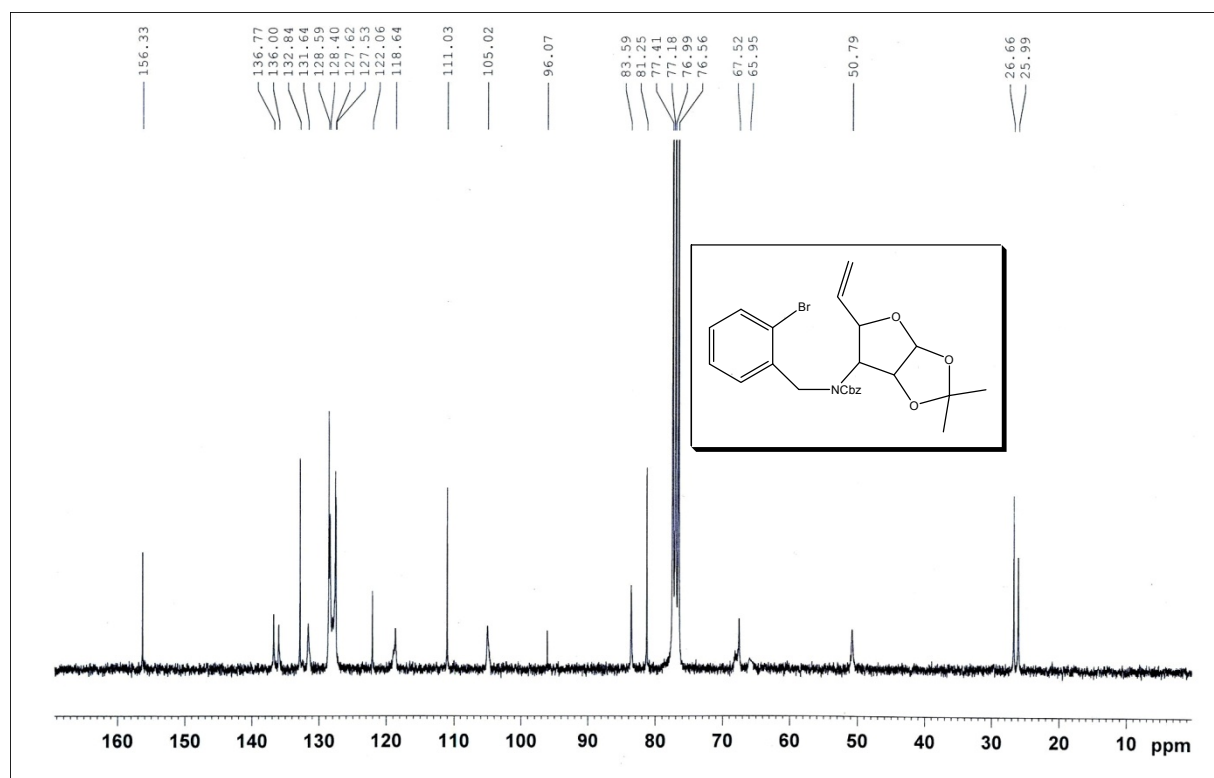

### <sup>1</sup>H NMR spectrum of compound 6c:

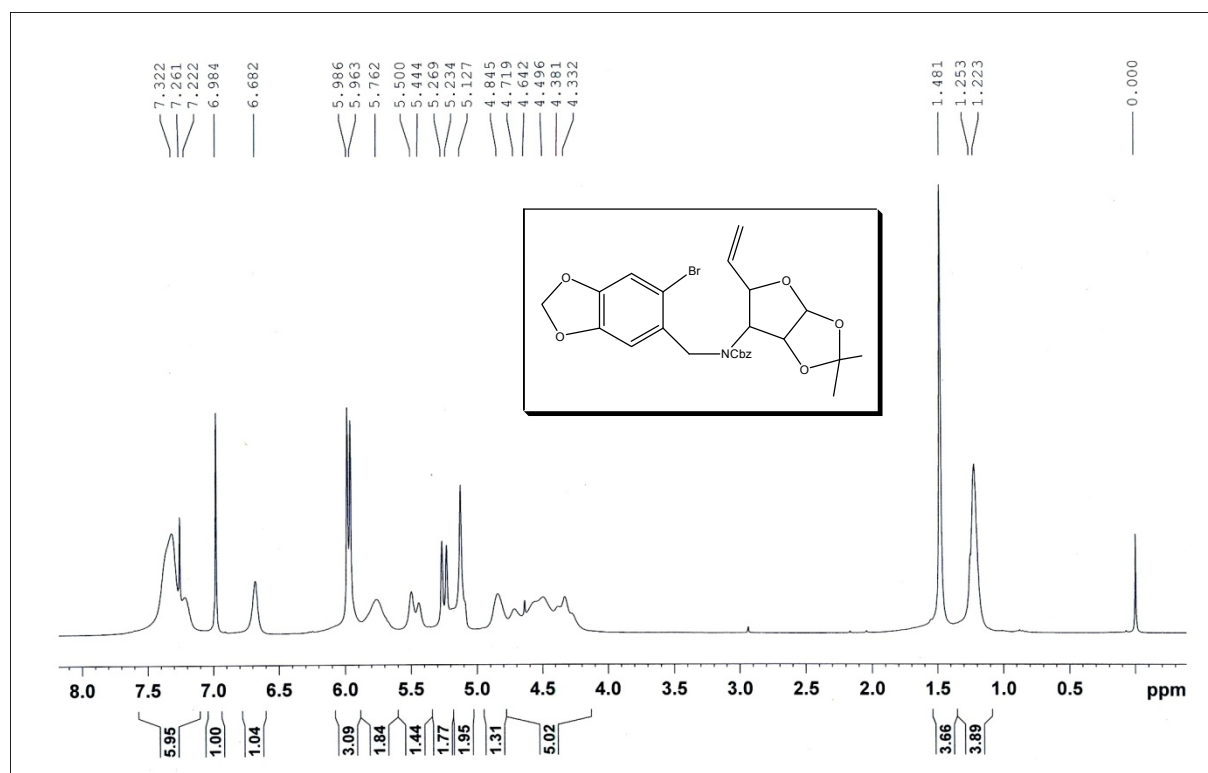

### <sup>13</sup>C NMR spectrum of compound 6c:

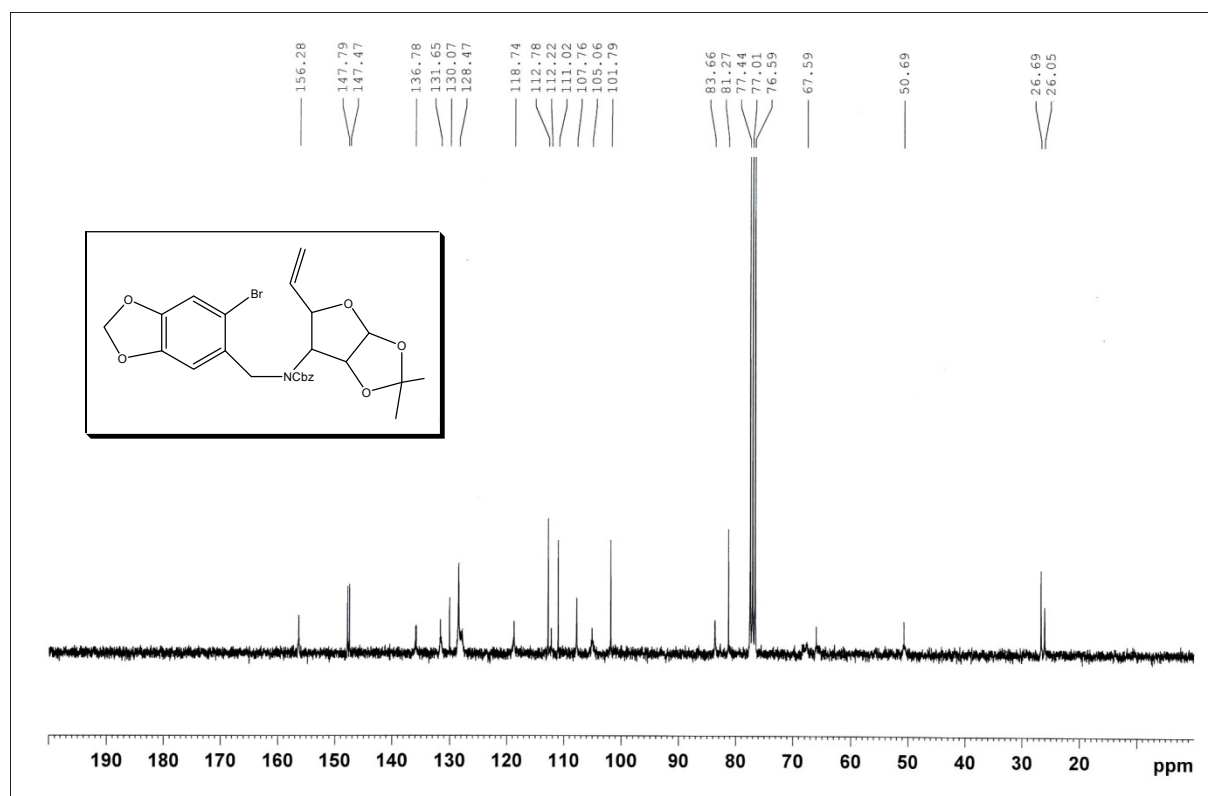

### <sup>1</sup>H NMR spectrum of compound 7a&7b:

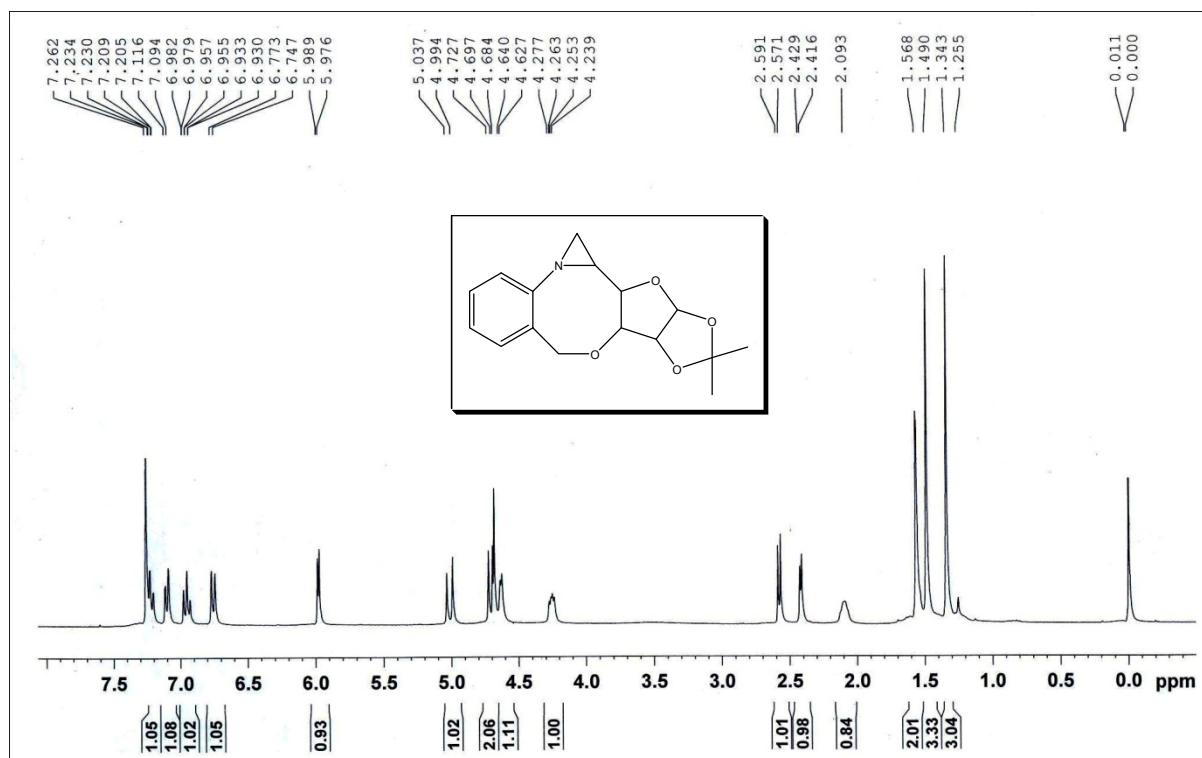

### <sup>13</sup>C NMR spectrum of compound 7a&7b:

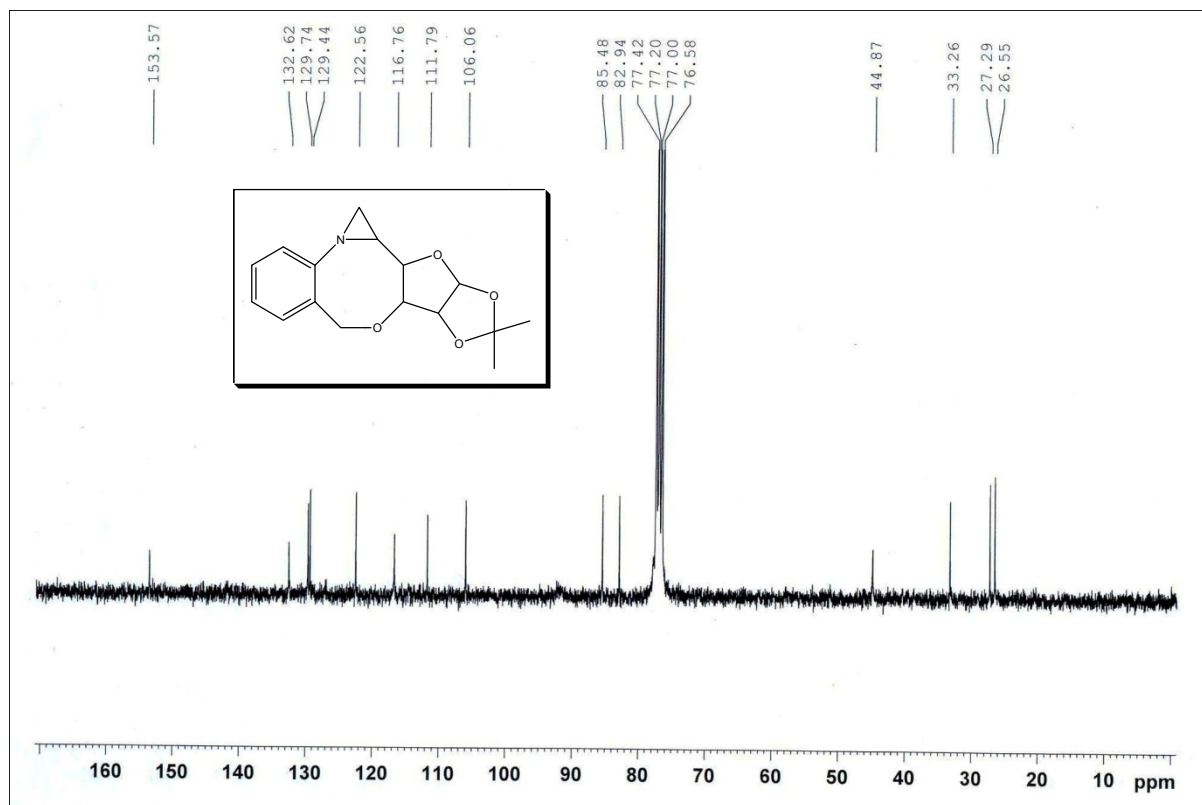

### <sup>1</sup>H NMR spectrum of compound 7c:

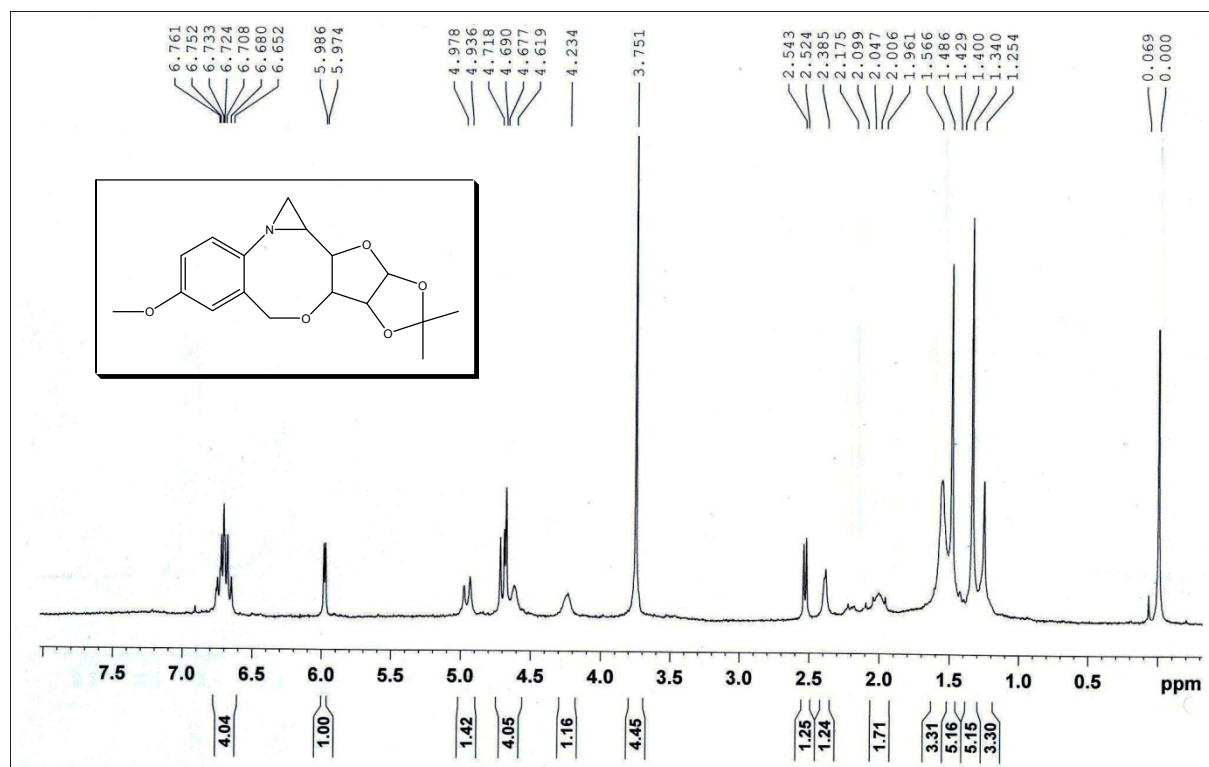

### <sup>13</sup>C NMR spectrum of compound 7c:

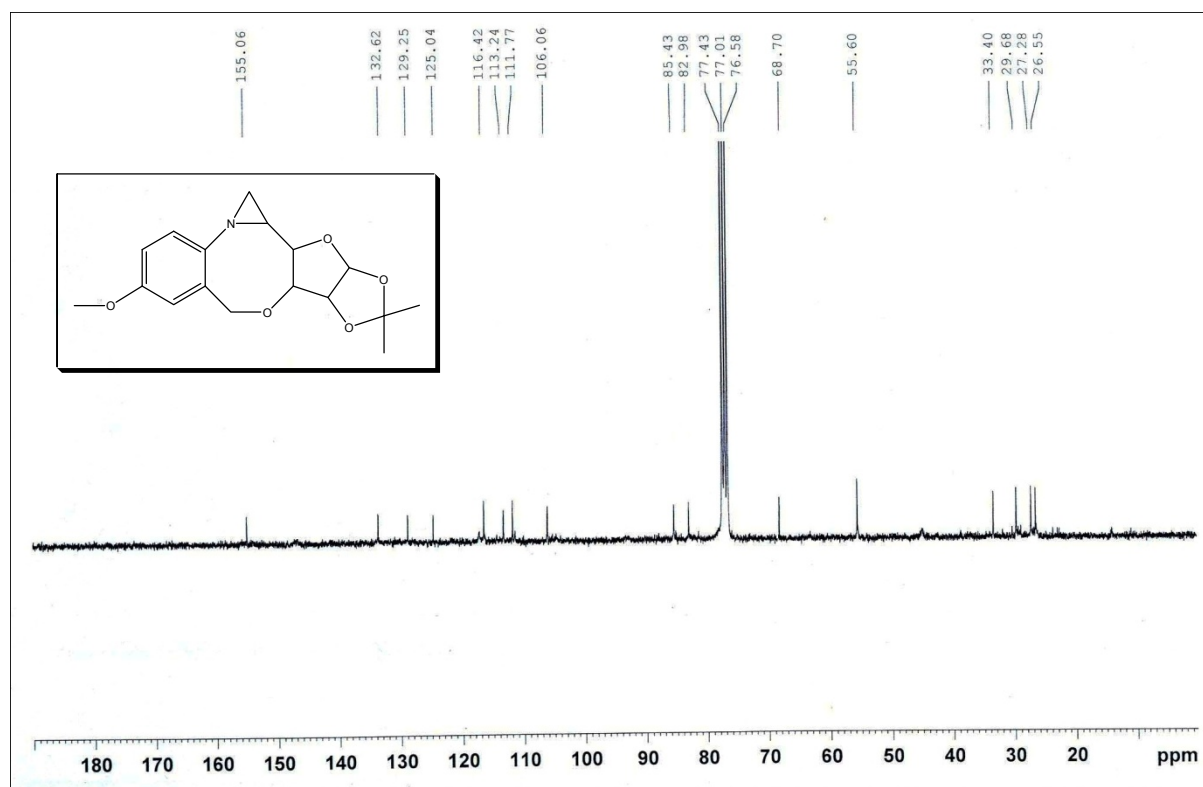

### <sup>1</sup>H NMR spectrum of compound 7d:

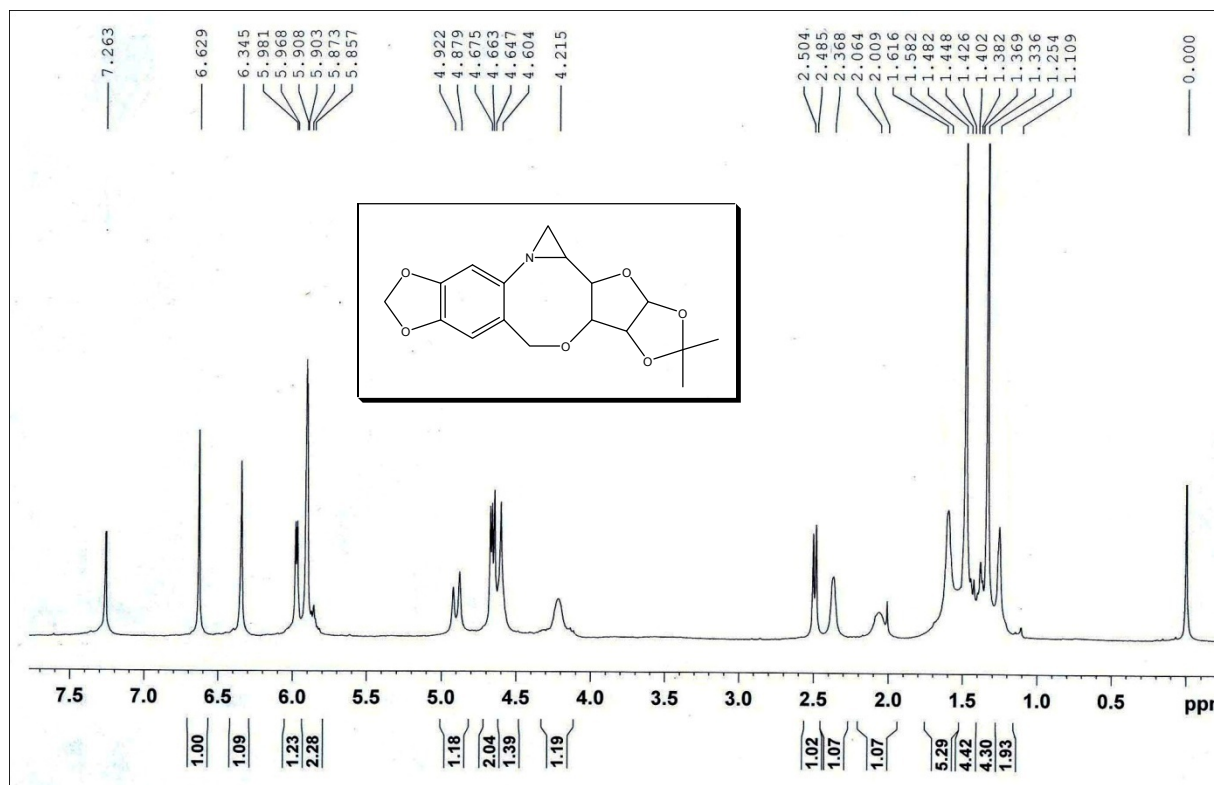

### <sup>13</sup>C NMR spectrum of compound 7d:

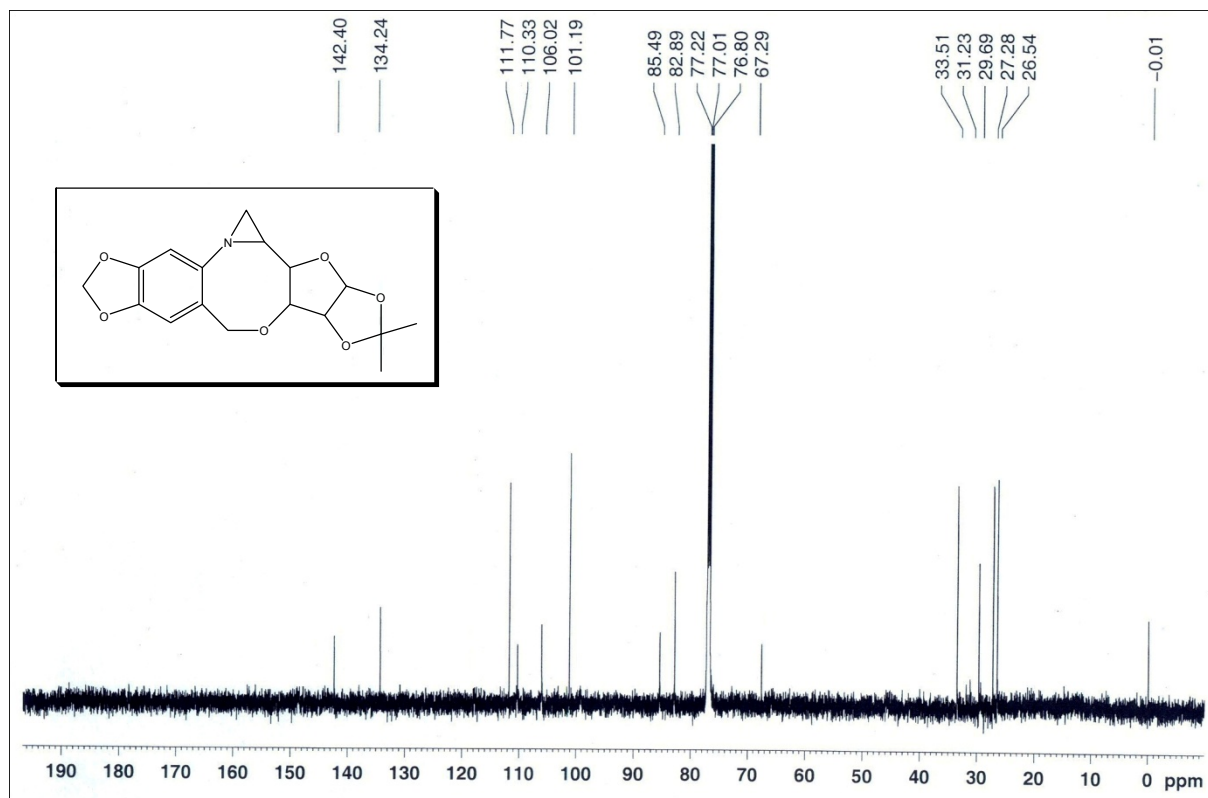

### <sup>1</sup>H NMR spectrum of compound 8a:

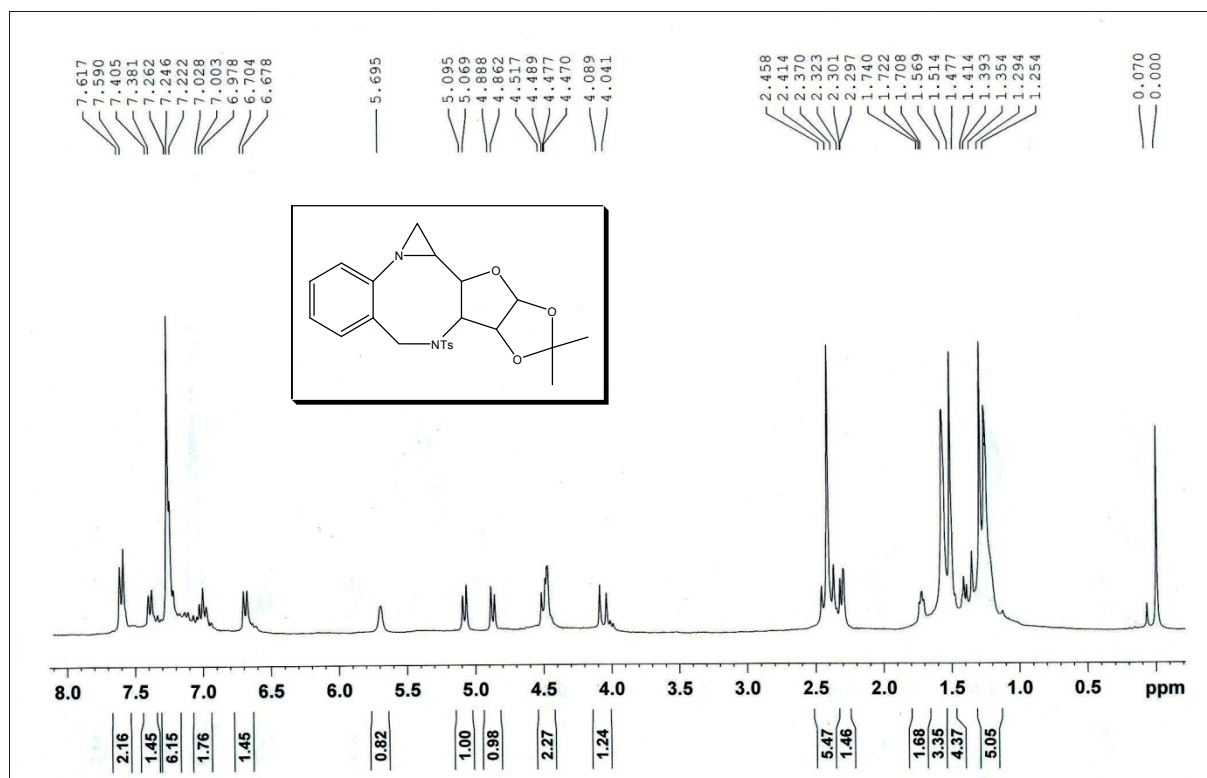

### <sup>13</sup>C NMR spectrum of compound 8a:

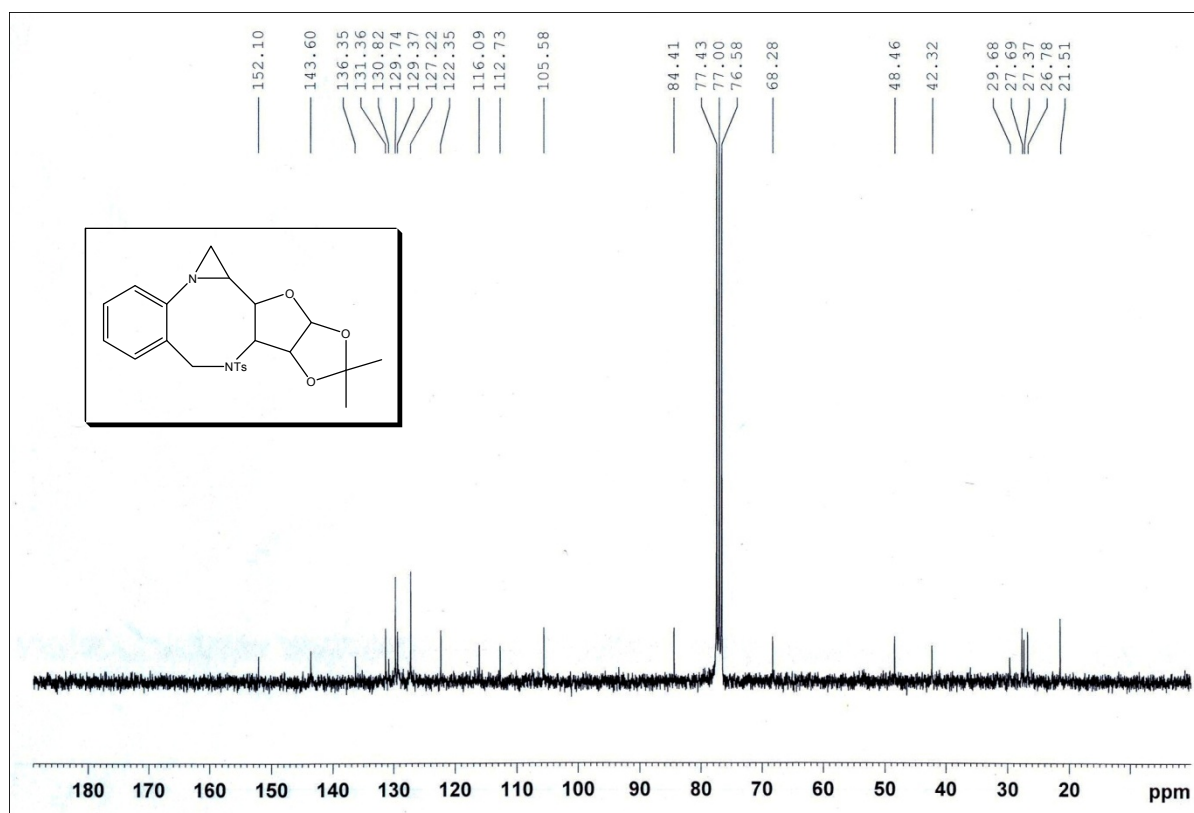

### <sup>1</sup>H NMR spectrum of compound 8b:

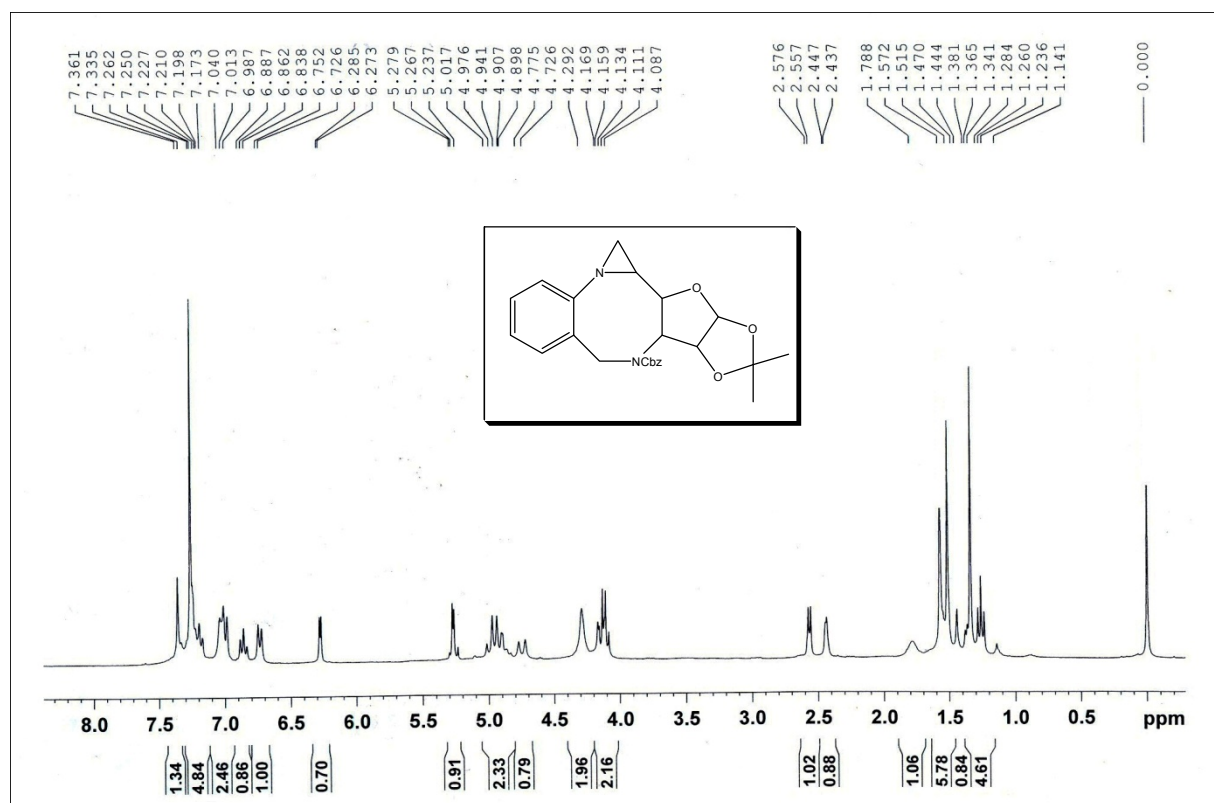

### <sup>13</sup>C NMR spectrum of compound 8b:

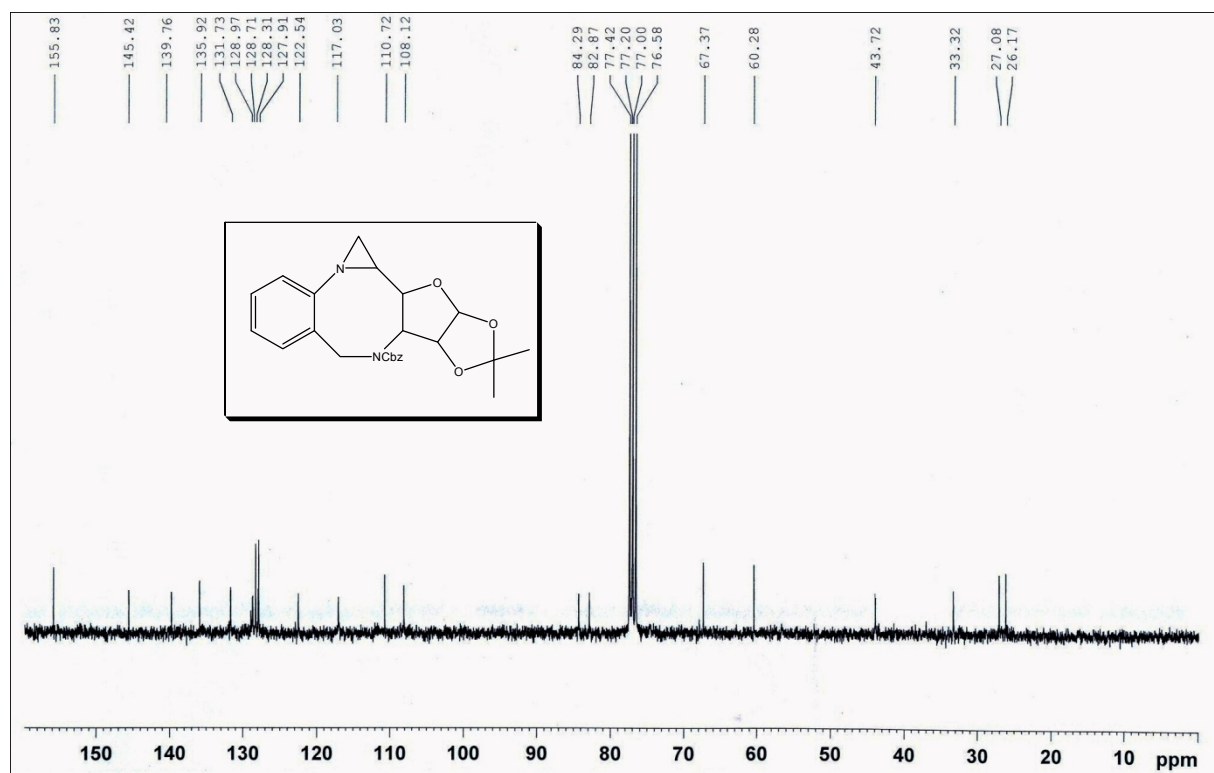

### <sup>1</sup>H spectrum NMR of compound 8c:

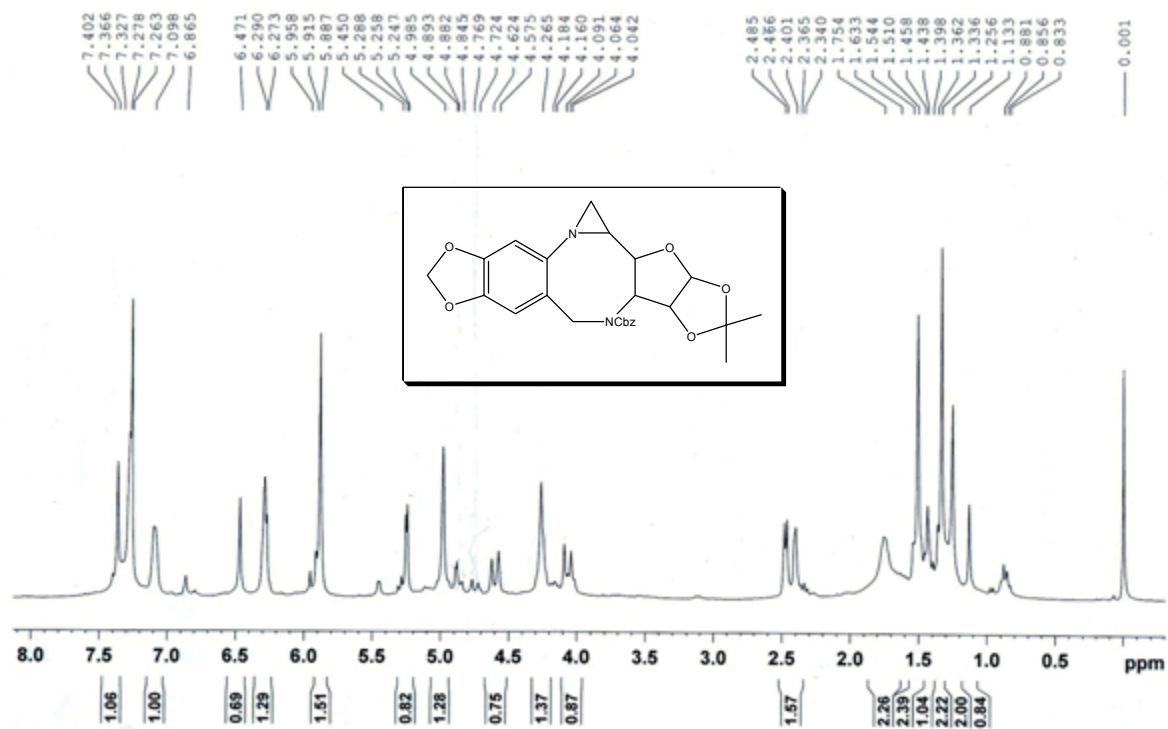

### <sup>13</sup>C NMR spectrum of compound 8c:

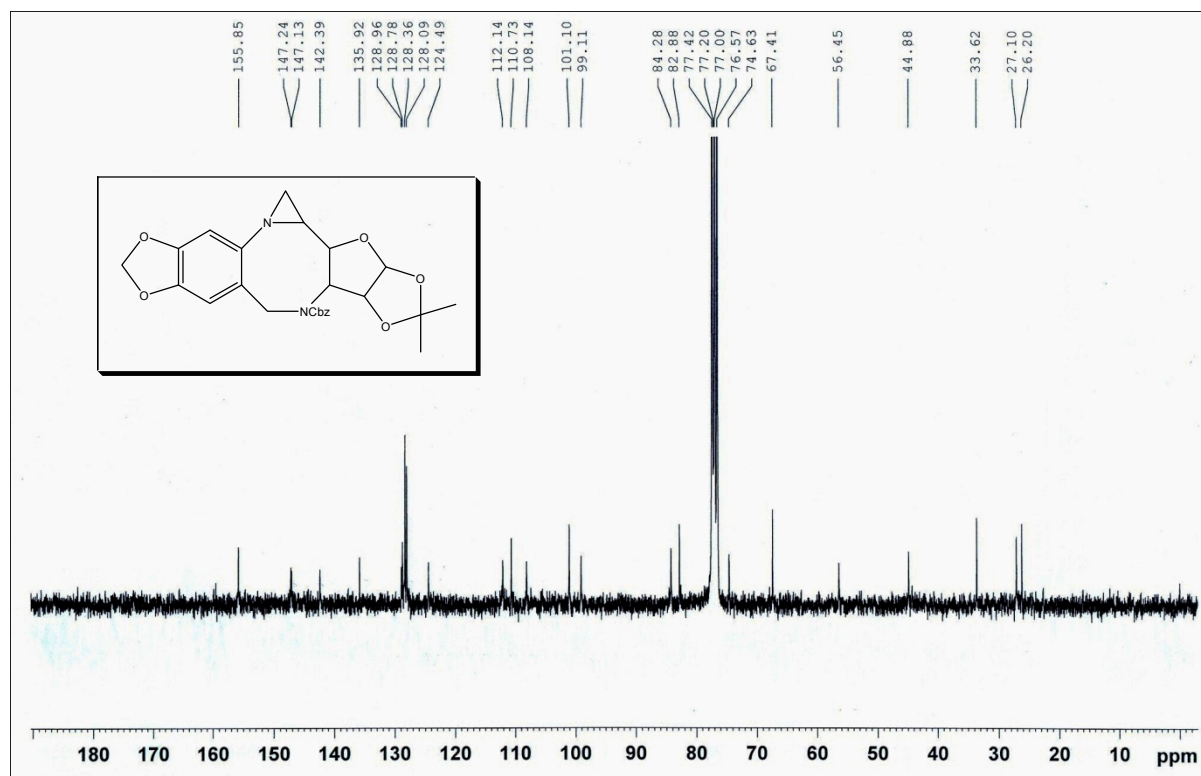



### <sup>1</sup>H NMR spectrum of compound 9b:

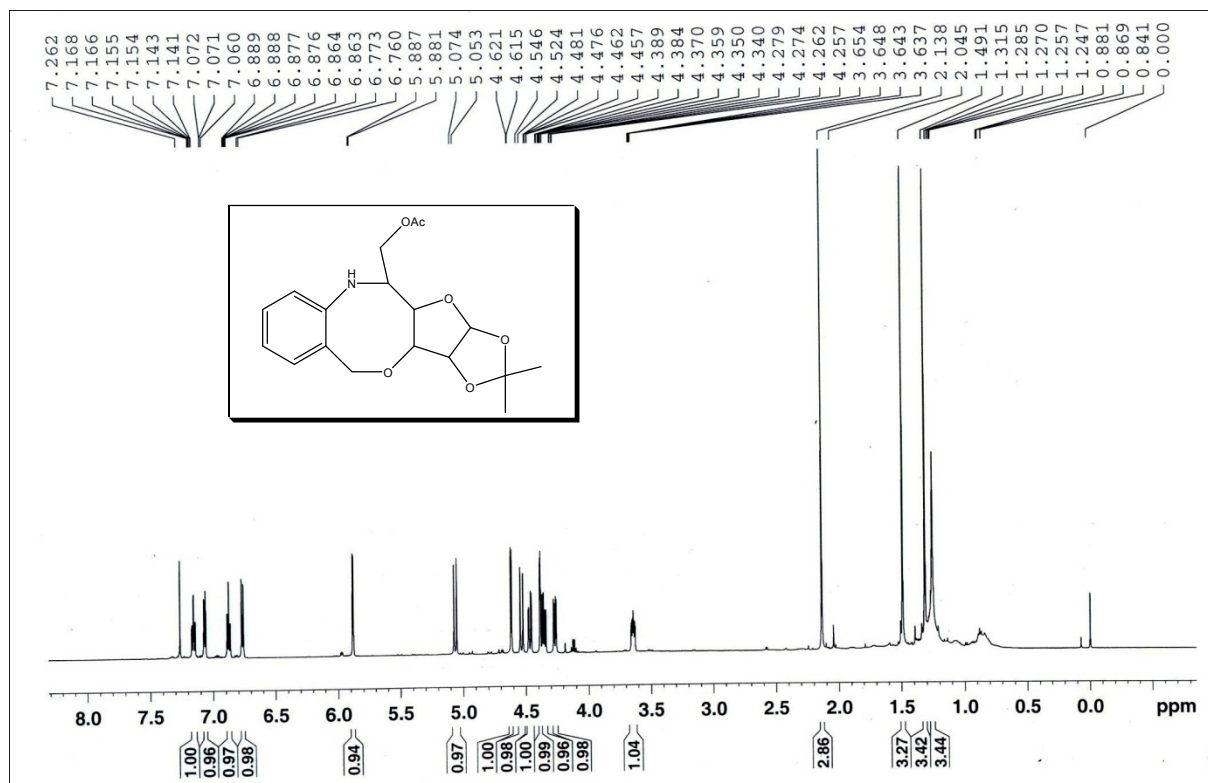

### <sup>13</sup>C NMR spectrum of compound 9b:

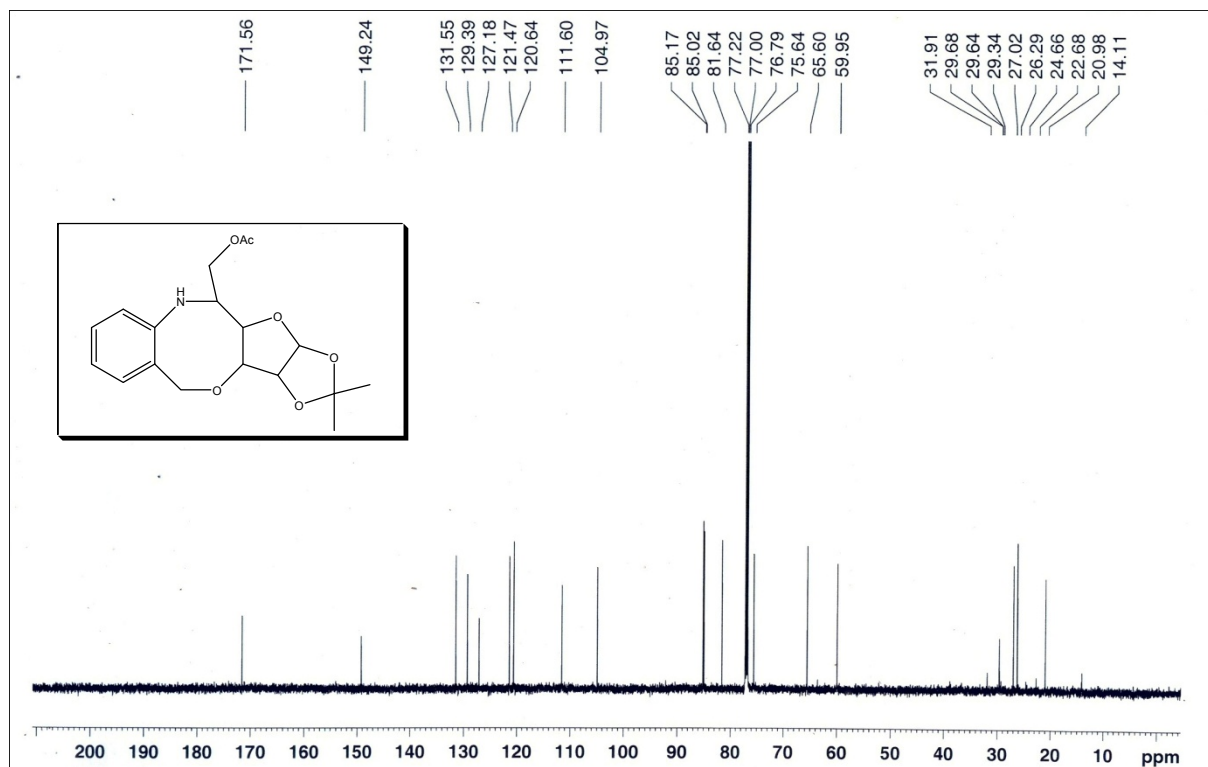

ROESY spectra of compound 9b

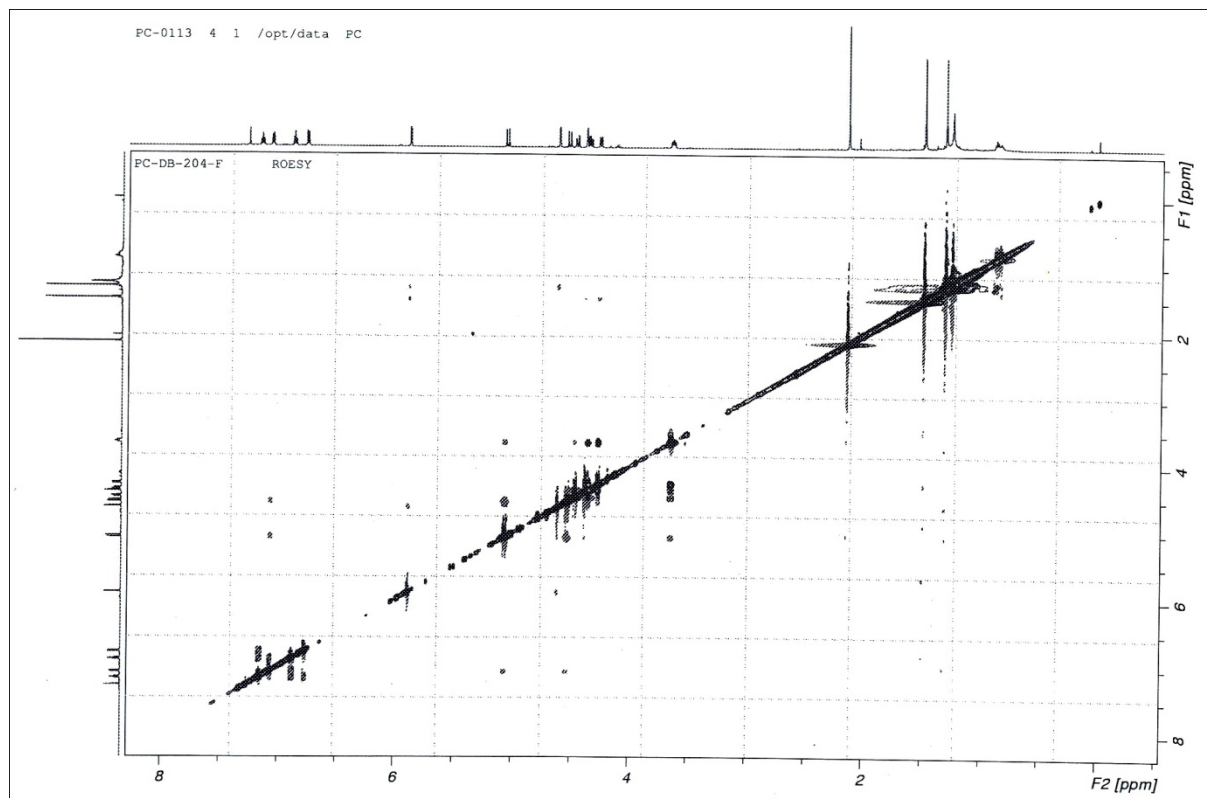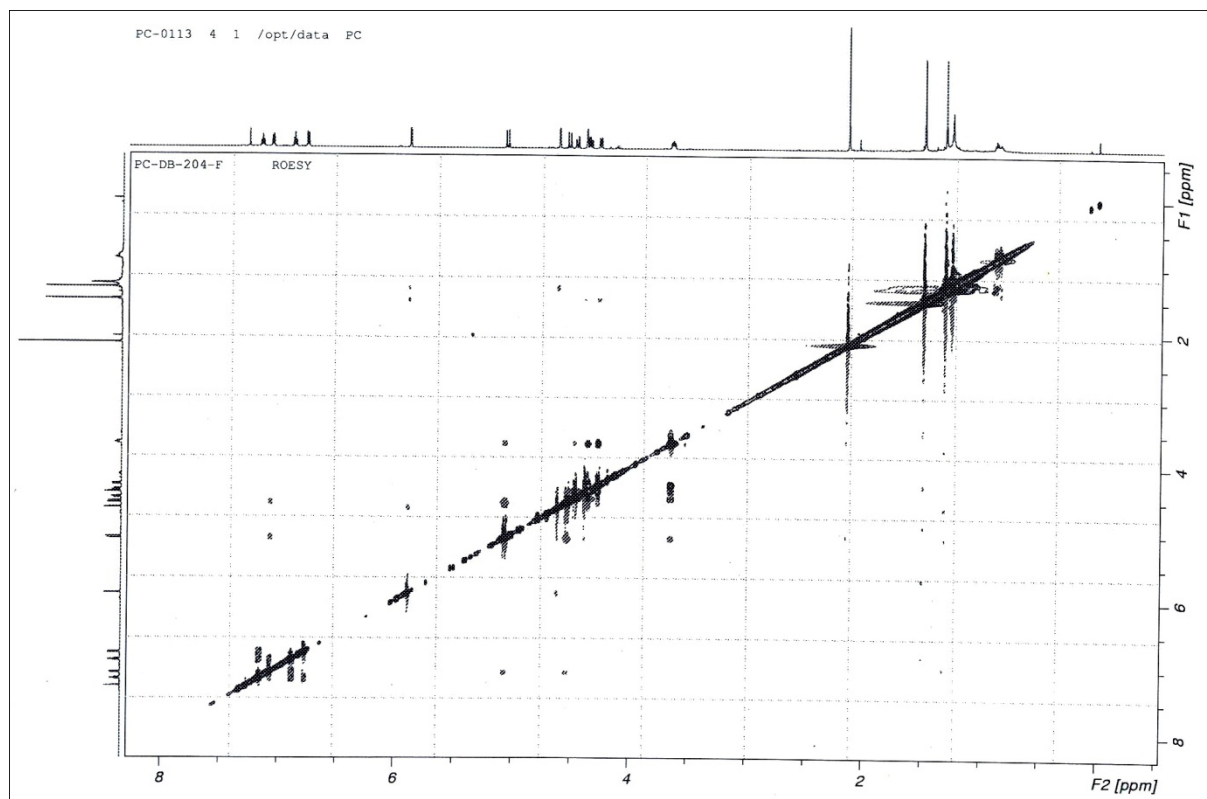

### <sup>1</sup>H NMR spectrum of compound 9d:

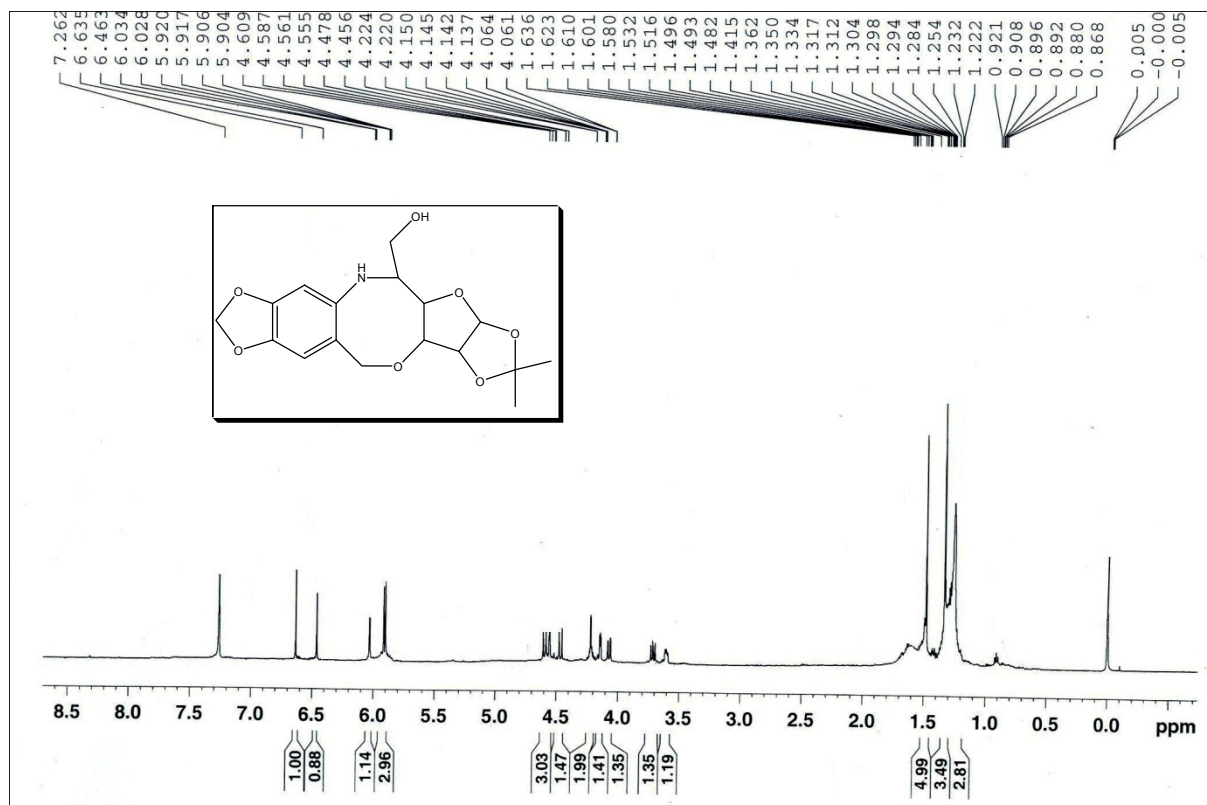

### <sup>13</sup>C NMR spectrum of compound 9d:

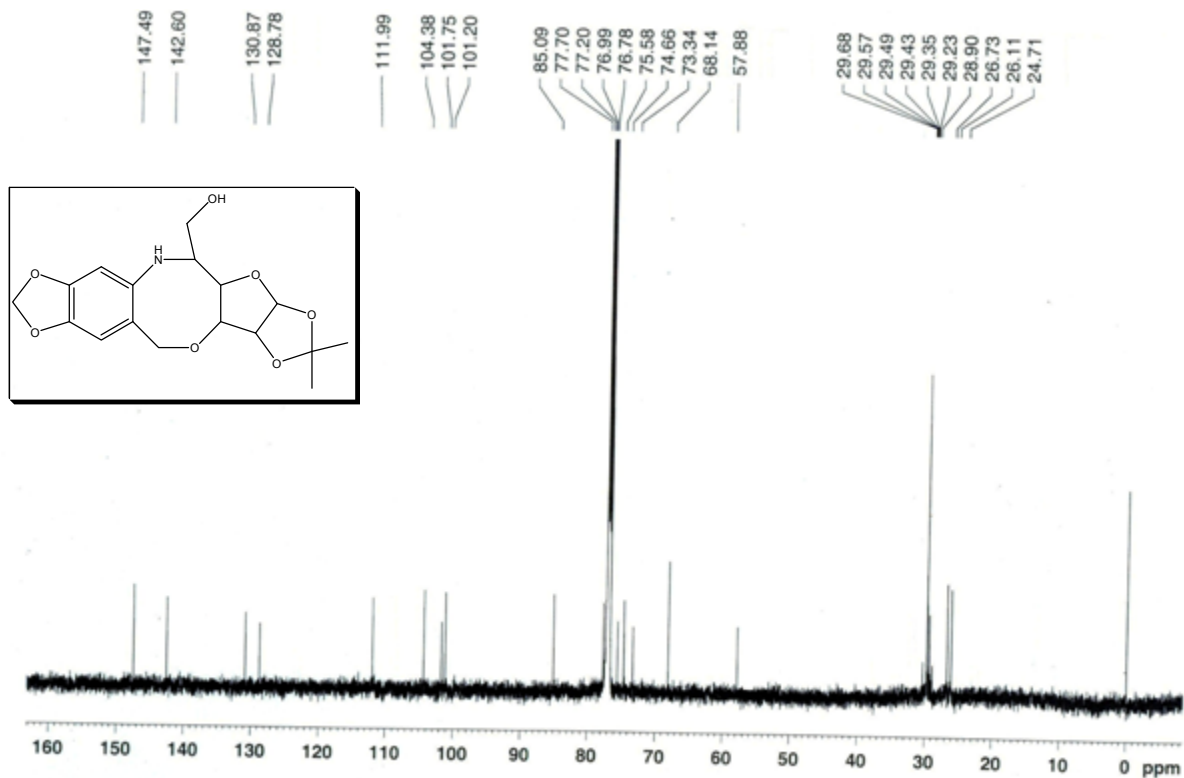

### $^1\text{H}$ NMR of compound 10

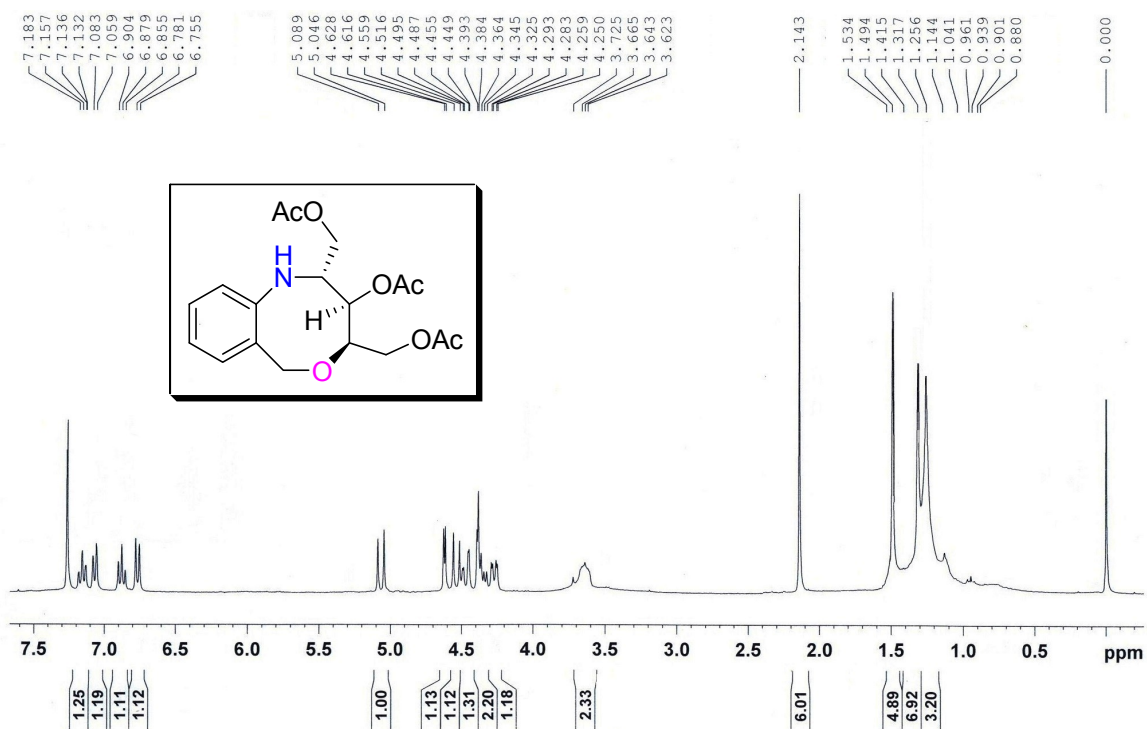

### $^{13}\text{C}$ NMR of compound 10

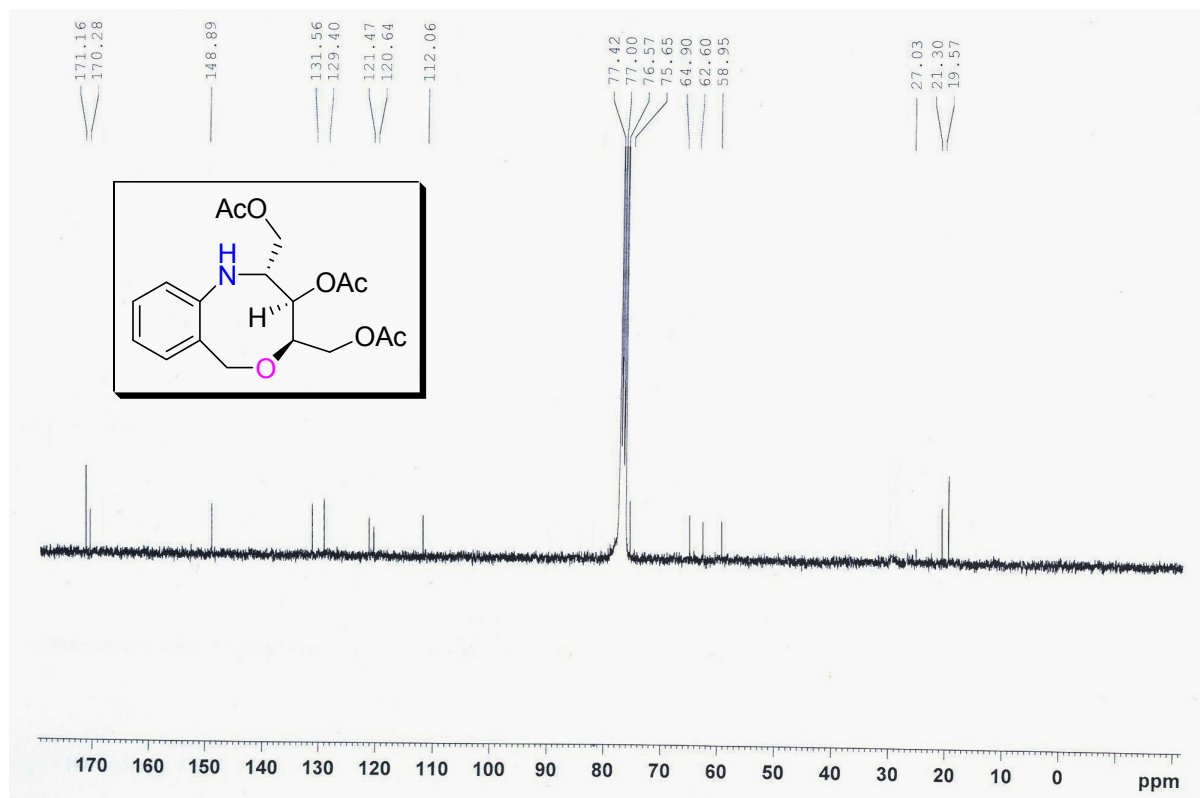

### DFT calculation data: Computational details

All geometries and energies were computed using the B3LYP (A. D. Becke, J. Chem. Phys., 1993, 98, 5648. ; C. Lee, W. Yang and R. G. Parr, Phys. Rev. B, 1988, 37, 785. ) density functional theory method as implemented in the Gaussian 09 package. The triple- $\zeta$  plus polarization basis set 6-311G+(2d,p) was used for all the atoms. The geometry optimization was performed *in vacuo*. Transition states were determined by potential energy surface scan of the reaction coordinates (Figure S1). The compound 8b contains a freely rotatable side-chain. The orientation of this group in 8b was optimized by applying rotation over the bond that connects it to the eight member ring, followed by geometry optimization to a local minima. The complete 360° scan over that bond was performed in 6 steps. Total energy in each local minima was plotted in the graphs shown in Figure S2. Lowest point in these curves indicate the conformations with optimum side chain orientation. Coordinates for all the optimized geometries are given at the end.

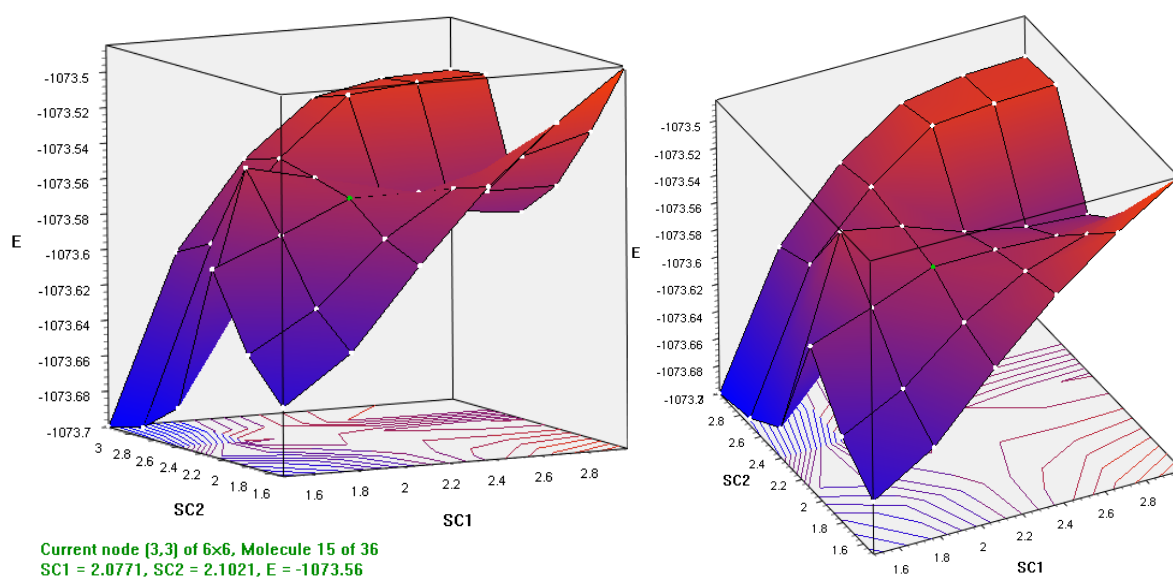

**Figure S1** Gaussian scan grid. Potential energy surface generated by perturbing the bond lengths along the reaction coordinate of cycloaddition that results in the trans conformation. The node at (3,3) indicates the transition state. Two different views are shown.

A

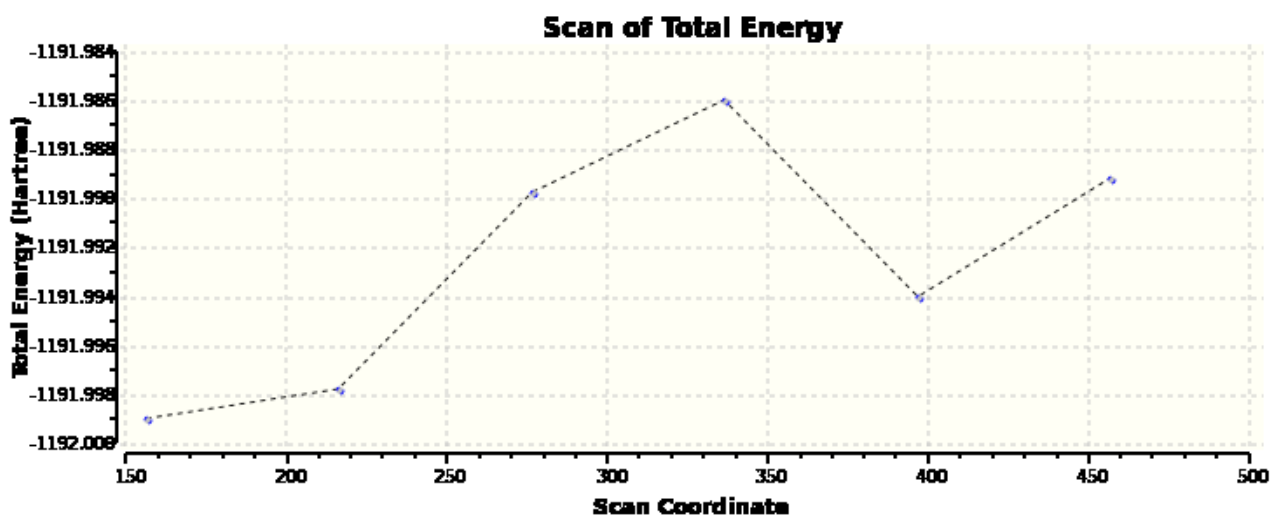

B

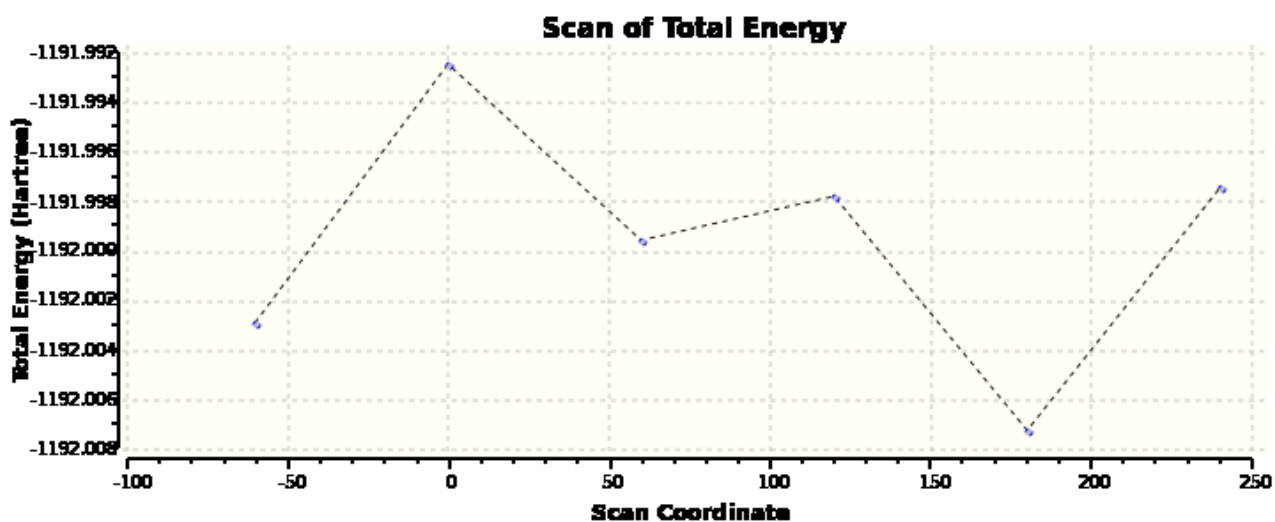

**Figure S2** Relaxed z-matrix optimization applying the rotation over the bond connection the acetoxy methyl groups to the eight member ring in cis-9b (A) and in trans-9b (B).

## Optimized coordinates of the stable reactant for cis-cycloaddition

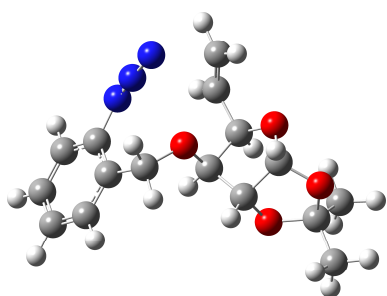

E (Hartree) = -1073.58352375

Standard orientation:

| -----  |        |        |                         |           |           |
|--------|--------|--------|-------------------------|-----------|-----------|
| Center | Atomic | Atomic | Coordinates (Angstroms) |           |           |
| Number | Number | Type   | X                       | Y         | Z         |
| -----  |        |        |                         |           |           |
| 1      | 6      | 0      | 4.428291                | -1.903694 | 1.108568  |
| 2      | 6      | 0      | 3.855496                | -2.753949 | 0.178827  |
| 3      | 6      | 0      | 2.892007                | -2.261488 | -0.677162 |
| 4      | 6      | 0      | 2.492635                | -0.932441 | -0.642383 |
| 5      | 6      | 0      | 3.087170                | -0.077045 | 0.283388  |
| 6      | 6      | 0      | 4.044290                | -0.581988 | 1.155380  |
| 7      | 6      | 0      | 1.412049                | -0.476732 | -1.599043 |
| 8      | 8      | 0      | 0.434747                | 0.384993  | -0.991261 |
| 9      | 6      | 0      | -0.369415               | -0.151044 | 0.070413  |
| 10     | 6      | 0      | -0.972034               | 1.041053  | 0.834452  |
| 11     | 6      | 0      | -0.018844               | 2.151741  | 1.155201  |
| 12     | 7      | 0      | 2.766824                | 1.294726  | 0.514970  |
| 13     | 6      | 0      | -1.598203               | -0.746074 | -0.581665 |
| 14     | 6      | 0      | -2.431763               | 0.487306  | -0.965971 |
| 15     | 8      | 0      | -2.018836               | 1.511755  | -0.066059 |
| 16     | 8      | 0      | -2.412505               | -1.350831 | 0.442699  |
| 17     | 6      | 0      | -3.800129               | -0.948439 | 0.280178  |
| 18     | 8      | 0      | -3.766775               | 0.064417  | -0.748089 |

|    |   |   |           |           |           |
|----|---|---|-----------|-----------|-----------|
| 19 | 6 | 0 | 0.105111  | 3.225734  | 0.406424  |
| 20 | 6 | 0 | -4.298230 | -0.359978 | 1.583453  |
| 21 | 6 | 0 | -4.617905 | -2.115929 | -0.231089 |
| 22 | 1 | 0 | 0.175168  | -0.831340 | 0.703615  |
| 23 | 1 | 0 | -1.426390 | 0.657317  | 1.734607  |
| 24 | 1 | 0 | 0.564223  | 2.017373  | 2.044621  |
| 25 | 1 | 0 | 2.427639  | -2.921974 | -1.384160 |
| 26 | 1 | 0 | 4.477490  | 0.093747  | 1.862573  |
| 27 | 1 | 0 | 1.826308  | 0.111132  | -2.406751 |
| 28 | 1 | 0 | 0.937788  | -1.349229 | -2.032194 |
| 29 | 1 | 0 | -1.405106 | -1.424970 | -1.395593 |
| 30 | 1 | 0 | -2.342286 | 0.831006  | -1.976344 |
| 31 | 1 | 0 | -0.505616 | 3.365113  | -0.459676 |
| 32 | 1 | 0 | 0.750419  | 4.034088  | 0.690122  |
| 33 | 1 | 0 | -3.735000 | 0.533174  | 1.808050  |
| 34 | 1 | 0 | -4.178599 | -1.080540 | 2.381225  |
| 35 | 1 | 0 | -5.342746 | -0.095105 | 1.487916  |
| 36 | 1 | 0 | -4.185668 | -2.484776 | -1.151576 |
| 37 | 1 | 0 | -5.631649 | -1.793665 | -0.425668 |
| 38 | 1 | 0 | -4.623530 | -2.911046 | 0.502268  |
| 39 | 1 | 0 | 5.171363  | -2.266776 | 1.789810  |
| 40 | 1 | 0 | 4.145015  | -3.784058 | 0.129944  |
| 41 | 7 | 0 | 2.396441  | 2.013341  | -0.462215 |
| 42 | 7 | 0 | 1.943158  | 2.811313  | -1.074891 |

---



### Optimized coordinates of transition state for cis-cycloaddition

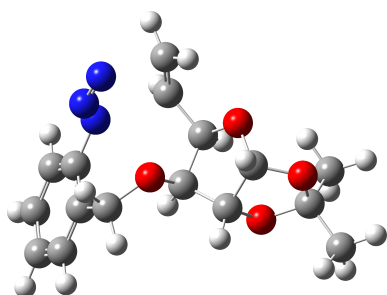

E (Hartree) = -1073.55219857

Standard orientation:

| -----  |        |        |                         |           |           |
|--------|--------|--------|-------------------------|-----------|-----------|
| Center | Atomic | Atomic | Coordinates (Angstroms) |           |           |
| Number | Number | Type   | X                       | Y         | Z         |
| -----  |        |        |                         |           |           |
| 1      | 6      | 0      | 4.142659                | -1.816884 | 1.338180  |
| 2      | 6      | 0      | 3.849608                | -2.660776 | 0.284055  |
| 3      | 6      | 0      | 3.018481                | -2.222474 | -0.732815 |
| 4      | 6      | 0      | 2.486574                | -0.945654 | -0.719820 |
| 5      | 6      | 0      | 2.804966                | -0.088304 | 0.330742  |
| 6      | 6      | 0      | 3.622091                | -0.536396 | 1.354846  |
| 7      | 6      | 0      | 1.536075                | -0.507740 | -1.811058 |
| 8      | 8      | 0      | 0.420639                | 0.250138  | -1.304434 |
| 9      | 6      | 0      | -0.302081               | -0.305834 | -0.198220 |
| 10     | 6      | 0      | -0.701244               | 0.822753  | 0.761006  |
| 11     | 6      | 0      | 0.333326                | 1.864208  | 1.142869  |
| 12     | 7      | 0      | 2.255640                | 1.226509  | 0.470526  |
| 13     | 6      | 0      | -1.641320               | -0.724166 | -0.758723 |
| 14     | 6      | 0      | -2.399841               | 0.601557  | -0.906428 |
| 15     | 8      | 0      | -1.813495               | 1.467246  | 0.066018  |
| 16     | 8      | 0      | -2.394027               | -1.379965 | 0.282481  |
| 17     | 6      | 0      | -3.751356               | -0.861937 | 0.319545  |
| 18     | 8      | 0      | -3.737023               | 0.258247  | -0.592502 |

|    |   |   |           |           |           |
|----|---|---|-----------|-----------|-----------|
| 19 | 6 | 0 | 0.290562  | 3.101878  | 0.566769  |
| 20 | 6 | 0 | -4.059802 | -0.390624 | 1.725144  |
| 21 | 6 | 0 | -4.714902 | -1.898584 | -0.218648 |
| 22 | 1 | 0 | 0.228092  | -1.100839 | 0.295852  |
| 23 | 1 | 0 | -1.082212 | 0.360051  | 1.657972  |
| 24 | 1 | 0 | 0.765208  | 1.736936  | 2.112310  |
| 25 | 1 | 0 | 2.768978  | -2.887664 | -1.537088 |
| 26 | 1 | 0 | 3.849073  | 0.140612  | 2.151934  |
| 27 | 1 | 0 | 2.025330  | 0.155780  | -2.509470 |
| 28 | 1 | 0 | 1.185777  | -1.379736 | -2.351422 |
| 29 | 1 | 0 | -1.585070 | -1.315629 | -1.656868 |
| 30 | 1 | 0 | -2.377254 | 1.065007  | -1.871356 |
| 31 | 1 | 0 | -0.472418 | 3.322414  | -0.145668 |
| 32 | 1 | 0 | 0.772627  | 3.931578  | 1.047115  |
| 33 | 1 | 0 | -3.400427 | 0.426272  | 1.976769  |
| 34 | 1 | 0 | -3.921734 | -1.204512 | 2.424097  |
| 35 | 1 | 0 | -5.081490 | -0.038701 | 1.775891  |
| 36 | 1 | 0 | -4.412559 | -2.190354 | -1.215408 |
| 37 | 1 | 0 | -5.711582 | -1.481474 | -0.263808 |
| 38 | 1 | 0 | -4.714155 | -2.770083 | 0.422125  |
| 39 | 1 | 0 | 4.776474  | -2.147465 | 2.136277  |
| 40 | 1 | 0 | 4.250910  | -3.653892 | 0.257012  |
| 41 | 7 | 0 | 2.379061  | 2.041476  | -0.571732 |
| 42 | 7 | 0 | 1.828856  | 2.972049  | -0.925000 |

---

### Optimized coordinates of the intermediate product for cis-cycloaddition

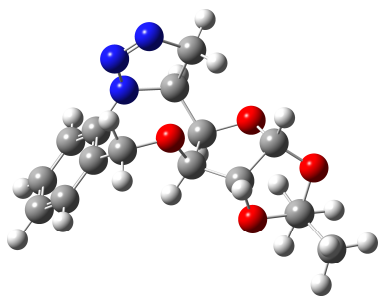

E (Hartree) = -1073.65319993

Standard orientation:

| -----  |        |        |                         |           |           |
|--------|--------|--------|-------------------------|-----------|-----------|
| Center | Atomic | Atomic | Coordinates (Angstroms) |           |           |
| Number | Number | Type   | X                       | Y         | Z         |
| -----  |        |        |                         |           |           |
| 1      | 6      | 0      | -3.634059               | -2.204261 | -1.277434 |
| 2      | 6      | 0      | -3.502763               | -2.798215 | -0.036850 |
| 3      | 6      | 0      | -2.891076               | -2.107022 | 0.994996  |
| 4      | 6      | 0      | -2.414323               | -0.821691 | 0.805154  |
| 5      | 6      | 0      | -2.563569               | -0.221036 | -0.442702 |
| 6      | 6      | 0      | -3.169777               | -0.915938 | -1.472528 |
| 7      | 6      | 0      | -1.702913               | -0.097130 | 1.930965  |
| 8      | 8      | 0      | -0.481000               | 0.548520  | 1.491688  |
| 9      | 6      | 0      | 0.330565                | -0.201137 | 0.584761  |
| 10     | 6      | 0      | 0.376391                | 0.485214  | -0.792662 |
| 11     | 6      | 0      | -0.742400               | 1.494241  | -1.091796 |
| 12     | 7      | 0      | -2.115231               | 1.105928  | -0.683046 |
| 13     | 6      | 0      | 1.772393                | -0.171990 | 1.042168  |
| 14     | 6      | 0      | 2.418346                | 1.033687  | 0.350115  |
| 15     | 8      | 0      | 1.614570                | 1.258897  | -0.813838 |
| 16     | 8      | 0      | 2.435755                | -1.272616 | 0.377847  |
| 17     | 6      | 0      | 3.693172                | -0.839520 | -0.200611 |
| 18     | 8      | 0      | 3.714670                | 0.590730  | 0.017295  |

|    |   |   |           |           |           |
|----|---|---|-----------|-----------|-----------|
| 19 | 6 | 0 | -0.578930 | 2.833121  | -0.333977 |
| 20 | 6 | 0 | 3.681171  | -1.144520 | -1.683792 |
| 21 | 6 | 0 | 4.852256  | -1.448768 | 0.558336  |
| 22 | 1 | 0 | -0.000604 | -1.220862 | 0.498700  |
| 23 | 1 | 0 | 0.434648  | -0.261808 | -1.567388 |
| 24 | 1 | 0 | -0.736105 | 1.679543  | -2.154544 |
| 25 | 1 | 0 | -2.772941 | -2.577014 | 1.952248  |
| 26 | 1 | 0 | -3.287627 | -0.426306 | -2.416913 |
| 27 | 1 | 0 | -2.313076 | 0.697173  | 2.327675  |
| 28 | 1 | 0 | -1.472857 | -0.800828 | 2.720987  |
| 29 | 1 | 0 | 1.892540  | -0.202857 | 2.110869  |
| 30 | 1 | 0 | 2.500025  | 1.933750  | 0.927555  |
| 31 | 1 | 0 | 0.210760  | 2.815860  | 0.390809  |
| 32 | 1 | 0 | -0.450800 | 3.671535  | -0.998489 |
| 33 | 1 | 0 | 2.884873  | -0.585329 | -2.150768 |
| 34 | 1 | 0 | 3.527363  | -2.203897 | -1.838669 |
| 35 | 1 | 0 | 4.622195  | -0.846215 | -2.126090 |
| 36 | 1 | 0 | 4.771341  | -1.193594 | 1.606231  |
| 37 | 1 | 0 | 5.785133  | -1.060090 | 0.173634  |
| 38 | 1 | 0 | 4.835855  | -2.525093 | 0.452470  |
| 39 | 1 | 0 | -4.103443 | -2.732242 | -2.082931 |
| 40 | 1 | 0 | -3.865008 | -3.793223 | 0.127388  |
| 41 | 7 | 0 | -2.633210 | 2.076942  | 0.249543  |
| 42 | 7 | 0 | -1.863150 | 3.013851  | 0.413278  |

---

### Optimized coordinates of the stable reactant for trans-cycloaddition

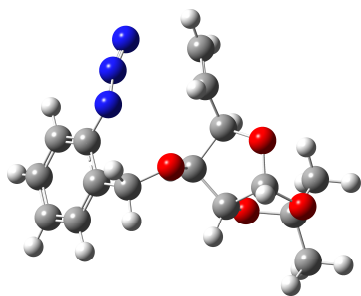

E (Hartree) = -1073.58328259

Standard orientation:

| -----  |        |        |                         |           |           |
|--------|--------|--------|-------------------------|-----------|-----------|
| Center | Atomic | Atomic | Coordinates (Angstroms) |           |           |
| Number | Number | Type   | X                       | Y         | Z         |
| -----  |        |        |                         |           |           |
| 1      | 6      | 0      | 4.031861                | -1.865784 | 1.331595  |
| 2      | 6      | 0      | 3.424846                | -2.872059 | 0.607593  |
| 3      | 6      | 0      | 2.567762                | -2.538862 | -0.427993 |
| 4      | 6      | 0      | 2.316396                | -1.220950 | -0.761212 |
| 5      | 6      | 0      | 2.935683                | -0.213568 | -0.024747 |
| 6      | 6      | 0      | 3.786937                | -0.541817 | 1.016556  |
| 7      | 6      | 0      | 1.382815                | -0.892138 | -1.910059 |
| 8      | 8      | 0      | 0.299207                | 0.010139  | -1.606699 |
| 9      | 6      | 0      | -0.359058               | -0.065967 | -0.339678 |
| 10     | 6      | 0      | -0.898088               | 1.336000  | -0.004402 |
| 11     | 6      | 0      | -0.023807               | 2.468581  | -0.438246 |
| 12     | 7      | 0      | 2.630438                | 1.120328  | -0.420584 |
| 13     | 6      | 0      | -1.630391               | -0.857827 | -0.534753 |
| 14     | 6      | 0      | -2.592294               | 0.137360  | -1.197414 |
| 15     | 8      | 0      | -2.137940               | 1.422074  | -0.782231 |
| 16     | 8      | 0      | -2.245214               | -1.041622 | 0.758912  |
| 17     | 6      | 0      | -3.663890               | -0.735439 | 0.686064  |
| 18     | 8      | 0      | -3.852195               | -0.201940 | -0.641684 |

|    |   |   |           |           |           |
|----|---|---|-----------|-----------|-----------|
| 19 | 6 | 0 | 0.414535  | 3.414490  | 0.368654  |
| 20 | 6 | 0 | -3.994355 | 0.314014  | 1.727050  |
| 21 | 6 | 0 | -4.472962 | -2.010126 | 0.803321  |
| 22 | 1 | 0 | 0.271418  | -0.461471 | 0.436759  |
| 23 | 1 | 0 | -1.135966 | 1.383182  | 1.046419  |
| 24 | 1 | 0 | 0.203525  | 2.468869  | -1.482428 |
| 25 | 1 | 0 | 2.080820  | -3.317193 | -0.982697 |
| 26 | 1 | 0 | 4.266754  | 0.236526  | 1.575233  |
| 27 | 1 | 0 | 1.929066  | -0.399721 | -2.700265 |
| 28 | 1 | 0 | 0.981786  | -1.820949 | -2.297543 |
| 29 | 1 | 0 | -1.510918 | -1.788673 | -1.063716 |
| 30 | 1 | 0 | -2.667229 | 0.096571  | -2.265327 |
| 31 | 1 | 0 | 0.961624  | 4.257129  | -0.004989 |
| 32 | 1 | 0 | 0.163545  | 3.441305  | 1.412044  |
| 33 | 1 | 0 | -3.463210 | 1.223222  | 1.490158  |
| 34 | 1 | 0 | -3.706056 | -0.038293 | 2.708364  |
| 35 | 1 | 0 | -5.056424 | 0.519766  | 1.713523  |
| 36 | 1 | 0 | -4.161511 | -2.706777 | 0.036693  |
| 37 | 1 | 0 | -5.523162 | -1.789370 | 0.669770  |
| 38 | 1 | 0 | -4.316278 | -2.458051 | 1.775453  |
| 39 | 1 | 0 | 4.695361  | -2.103291 | 2.138827  |
| 40 | 1 | 0 | 3.607169  | -3.899998 | 0.846430  |
| 41 | 7 | 0 | 2.779945  | 2.018016  | 0.456526  |
| 42 | 7 | 0 | 2.662884  | 2.934879  | 1.065048  |

---

### Optimized coordinates of transition state for trans-cycloaddition

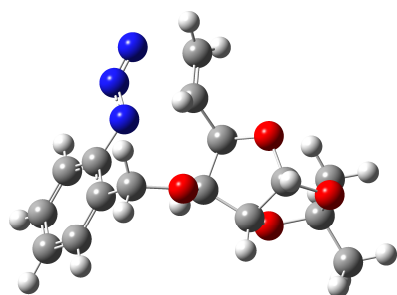

E (Hartree) = -1073.55908695

Standard orientation:

| -----  |        |        |                         |           |           |
|--------|--------|--------|-------------------------|-----------|-----------|
| Center | Atomic | Atomic | Coordinates (Angstroms) |           |           |
| Number | Number | Type   | X                       | Y         | Z         |
| -----  |        |        |                         |           |           |
| 1      | 6      | 0      | -3.990218               | -1.674748 | -1.499677 |
| 2      | 6      | 0      | -3.716125               | -2.660765 | -0.570008 |
| 3      | 6      | 0      | -2.943097               | -2.347354 | 0.532192  |
| 4      | 6      | 0      | -2.449391               | -1.068797 | 0.725947  |
| 5      | 6      | 0      | -2.710306               | -0.085496 | -0.227635 |
| 6      | 6      | 0      | -3.486234               | -0.399957 | -1.336455 |
| 7      | 6      | 0      | -1.651690               | -0.732877 | 1.961138  |
| 8      | 8      | 0      | -0.216947               | -0.576010 | 1.767753  |
| 9      | 6      | 0      | 0.346026                | -0.454796 | 0.457574  |
| 10     | 6      | 0      | 0.649266                | 1.014295  | 0.133172  |
| 11     | 6      | 0      | -0.305599               | 2.012636  | 0.718515  |
| 12     | 7      | 0      | -2.120665               | 1.185357  | -0.020200 |
| 13     | 6      | 0      | 1.726954                | -1.050602 | 0.574718  |
| 14     | 6      | 0      | 2.575657                | 0.062211  | 1.197271  |
| 15     | 8      | 0      | 1.925636                | 1.273337  | 0.805711  |
| 16     | 8      | 0      | 2.286413                | -1.125192 | -0.755616 |
| 17     | 6      | 0      | 3.652821                | -0.633438 | -0.751613 |
| 18     | 8      | 0      | 3.837825                | -0.090740 | 0.574906  |

|    |   |   |           |           |           |
|----|---|---|-----------|-----------|-----------|
| 19 | 6 | 0 | -0.379016 | 3.289870  | 0.229886  |
| 20 | 6 | 0 | 3.782111  | 0.461243  | -1.790079 |
| 21 | 6 | 0 | 4.618952  | -1.785460 | -0.930140 |
| 22 | 1 | 0 | -0.245232 | -0.935075 | -0.299442 |
| 23 | 1 | 0 | 0.771551  | 1.144716  | -0.928894 |
| 24 | 1 | 0 | -0.590676 | 1.808688  | 1.725788  |
| 25 | 1 | 0 | -2.726916 | -3.101773 | 1.263404  |
| 26 | 1 | 0 | -3.694175 | 0.356948  | -2.062995 |
| 27 | 1 | 0 | -2.027569 | 0.185200  | 2.386266  |
| 28 | 1 | 0 | -1.764190 | -1.521271 | 2.689432  |
| 29 | 1 | 0 | 1.755654  | -1.993809 | 1.090428  |
| 30 | 1 | 0 | 2.706412  | 0.034651  | 2.260040  |
| 31 | 1 | 0 | -0.734324 | 4.082817  | 0.857826  |
| 32 | 1 | 0 | 0.222060  | 3.582025  | -0.608975 |
| 33 | 1 | 0 | 3.140042  | 1.283528  | -1.513677 |
| 34 | 1 | 0 | 3.498061  | 0.080635  | -2.761972 |
| 35 | 1 | 0 | 4.804145  | 0.814421  | -1.823604 |
| 36 | 1 | 0 | 4.445318  | -2.524959 | -0.160113 |
| 37 | 1 | 0 | 5.635359  | -1.425581 | -0.847101 |
| 38 | 1 | 0 | 4.472798  | -2.241617 | -1.900037 |
| 39 | 1 | 0 | -4.591253 | -1.895745 | -2.359158 |
| 40 | 1 | 0 | -4.098357 | -3.652776 | -0.698906 |
| 41 | 7 | 0 | -2.546985 | 2.188173  | -0.752685 |
| 42 | 7 | 0 | -2.184177 | 3.253903  | -0.941282 |

---



### Optimized coordinates of the intermediate product for trans-cycloaddition

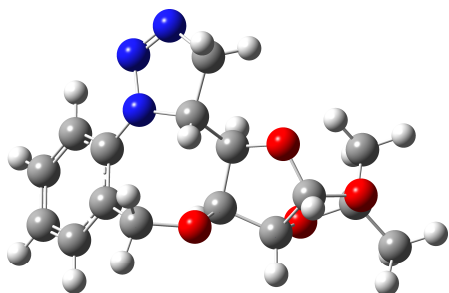

E (Hartree) = -1073.66145233

Standard orientation:

| -----  |        |        |                         |           |           |
|--------|--------|--------|-------------------------|-----------|-----------|
| Center | Atomic | Atomic | Coordinates (Angstroms) |           |           |
| Number | Number | Type   | X                       | Y         | Z         |
| -----  |        |        |                         |           |           |
| 1      | 6      | 0      | -4.060239               | -1.238006 | -1.629506 |
| 2      | 6      | 0      | -3.864416               | -2.370348 | -0.859704 |
| 3      | 6      | 0      | -3.054555               | -2.280565 | 0.251662  |
| 4      | 6      | 0      | -2.440931               | -1.090139 | 0.620615  |
| 5      | 6      | 0      | -2.617940               | 0.043137  | -0.179742 |
| 6      | 6      | 0      | -3.441763               | -0.051745 | -1.302193 |
| 7      | 6      | 0      | -1.632631               | -1.070354 | 1.898049  |
| 8      | 8      | 0      | -0.184487               | -0.980788 | 1.739709  |
| 9      | 6      | 0      | 0.373036                | -0.792051 | 0.434976  |
| 10     | 6      | 0      | 0.430909                | 0.706636  | 0.096852  |
| 11     | 6      | 0      | -0.679118               | 1.511281  | 0.746821  |
| 12     | 7      | 0      | -1.991211               | 1.262926  | 0.115512  |
| 13     | 6      | 0      | 1.831415                | -1.149711 | 0.581501  |
| 14     | 6      | 0      | 2.490668                | 0.105709  | 1.163598  |
| 15     | 8      | 0      | 1.650287                | 1.184016  | 0.736163  |
| 16     | 8      | 0      | 2.403973                | -1.183351 | -0.744080 |
| 17     | 6      | 0      | 3.674416                | -0.482031 | -0.760778 |
| 18     | 8      | 0      | 3.757436                | 0.144635  | 0.541540  |

|    |   |   |           |           |           |
|----|---|---|-----------|-----------|-----------|
| 19 | 6 | 0 | -0.526502 | 3.022374  | 0.489168  |
| 20 | 6 | 0 | 3.637087  | 0.570373  | -1.848388 |
| 21 | 6 | 0 | 4.814213  | -1.470823 | -0.881599 |
| 22 | 1 | 0 | -0.121985 | -1.375095 | -0.320510 |
| 23 | 1 | 0 | 0.482642  | 0.868057  | -0.967673 |
| 24 | 1 | 0 | -0.683799 | 1.300248  | 1.797273  |
| 25 | 1 | 0 | -2.897491 | -3.146980 | 0.864315  |
| 26 | 1 | 0 | -3.589886 | 0.815670  | -1.904750 |
| 27 | 1 | 0 | -1.939644 | -0.239193 | 2.515002  |
| 28 | 1 | 0 | -1.817668 | -1.981446 | 2.445657  |
| 29 | 1 | 0 | 2.004829  | -2.055912 | 1.133671  |
| 30 | 1 | 0 | 2.620583  | 0.135541  | 2.226450  |
| 31 | 1 | 0 | -0.742124 | 3.612891  | 1.367342  |
| 32 | 1 | 0 | 0.440500  | 3.288554  | 0.100075  |
| 33 | 1 | 0 | 2.859495  | 1.283765  | -1.621577 |
| 34 | 1 | 0 | 3.439067  | 0.103516  | -2.803697 |
| 35 | 1 | 0 | 4.585404  | 1.089291  | -1.887902 |
| 36 | 1 | 0 | 4.754554  | -2.192018 | -0.077693 |
| 37 | 1 | 0 | 5.758899  | -0.948894 | -0.814179 |
| 38 | 1 | 0 | 4.752162  | -1.989291 | -1.828834 |
| 39 | 1 | 0 | -4.688822 | -1.276512 | -2.496869 |
| 40 | 1 | 0 | -4.333360 | -3.297887 | -1.117546 |
| 41 | 7 | 0 | -2.348967 | 2.387984  | -0.693334 |
| 42 | 7 | 0 | -1.588813 | 3.335827  | -0.525492 |

---

### Optimized coordinates for cis-7b

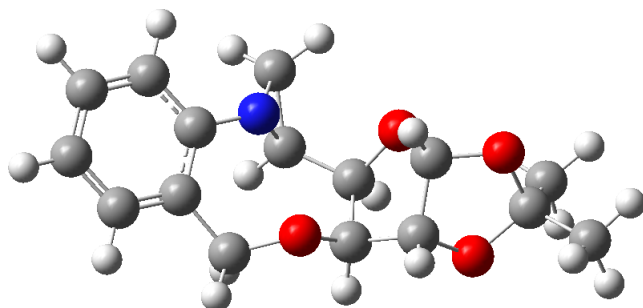

E (Hartree) = -965.39446217

Standard orientation:

| -----  |        |        |                         |           |           |  |
|--------|--------|--------|-------------------------|-----------|-----------|--|
| Center | Atomic | Atomic | Coordinates (Angstroms) |           |           |  |
| Number | Number | Type   | X                       | Y         | Z         |  |
| -----  |        |        |                         |           |           |  |
| 1      | 6      | 0      | 5.048288                | 0.530260  | -0.825869 |  |
| 2      | 6      | 0      | 5.190319                | -0.797121 | -0.470220 |  |
| 3      | 6      | 0      | 4.095028                | -1.482638 | 0.027011  |  |
| 4      | 6      | 0      | 2.869358                | -0.863831 | 0.189541  |  |
| 5      | 6      | 0      | 2.734358                | 0.479675  | -0.167888 |  |
| 6      | 6      | 0      | 3.828533                | 1.163297  | -0.676897 |  |
| 7      | 6      | 0      | 1.705768                | -1.650035 | 0.762903  |  |
| 8      | 8      | 0      | 0.471413                | -1.398594 | 0.058053  |  |
| 9      | 6      | 0      | -0.669277               | -0.931016 | 0.782816  |  |
| 10     | 6      | 0      | -0.675717               | 0.602951  | 1.018381  |  |
| 11     | 6      | 0      | 0.703466                | 1.154589  | 1.163551  |  |
| 12     | 7      | 0      | 1.486393                | 1.087014  | -0.059031 |  |
| 13     | 6      | 0      | -1.812457               | -1.105216 | -0.186078 |  |
| 14     | 6      | 0      | -1.793777               | 0.164550  | -1.042647 |  |
| 15     | 8      | 0      | -1.282913               | 1.173813  | -0.164819 |  |

|    |   |   |           |           |           |
|----|---|---|-----------|-----------|-----------|
| 16 | 8 | 0 | -3.049466 | -0.932769 | 0.539929  |
| 17 | 6 | 0 | -3.957220 | -0.093800 | -0.223196 |
| 18 | 8 | 0 | -3.159948 | 0.388614  | -1.330149 |
| 19 | 6 | 0 | 1.141049  | 2.410185  | 0.455236  |
| 20 | 6 | 0 | -4.402408 | 1.060994  | 0.649268  |
| 21 | 6 | 0 | -5.087264 | -0.929054 | -0.786704 |
| 22 | 1 | 0 | -0.819216 | -1.477958 | 1.702324  |
| 23 | 1 | 0 | -1.293106 | 0.827903  | 1.873985  |
| 24 | 1 | 0 | 1.205260  | 0.939737  | 2.090201  |
| 25 | 1 | 0 | 4.195297  | -2.519058 | 0.288352  |
| 26 | 1 | 0 | 3.711461  | 2.188308  | -0.965070 |
| 27 | 1 | 0 | 1.916938  | -2.707411 | 0.678411  |
| 28 | 1 | 0 | 1.581910  | -1.422526 | 1.816945  |
| 29 | 1 | 0 | -1.775920 | -2.028620 | -0.735096 |
| 30 | 1 | 0 | -1.231744 | 0.130700  | -1.952990 |
| 31 | 1 | 0 | 0.422277  | 2.941746  | -0.128761 |
| 32 | 1 | 0 | 1.914826  | 2.984798  | 0.930724  |
| 33 | 1 | 0 | -3.538168 | 1.650584  | 0.912729  |
| 34 | 1 | 0 | -4.879502 | 0.682180  | 1.543273  |
| 35 | 1 | 0 | -5.098567 | 1.684089  | 0.103669  |
| 36 | 1 | 0 | -4.679159 | -1.737062 | -1.378703 |
| 37 | 1 | 0 | -5.714766 | -0.315070 | -1.418210 |
| 38 | 1 | 0 | -5.677369 | -1.342521 | 0.020145  |
| 39 | 1 | 0 | 5.882229  | 1.075070  | -1.222133 |
| 40 | 1 | 0 | 6.131594  | -1.295239 | -0.585918 |

-----

### Optimized coordinates for trans-7b

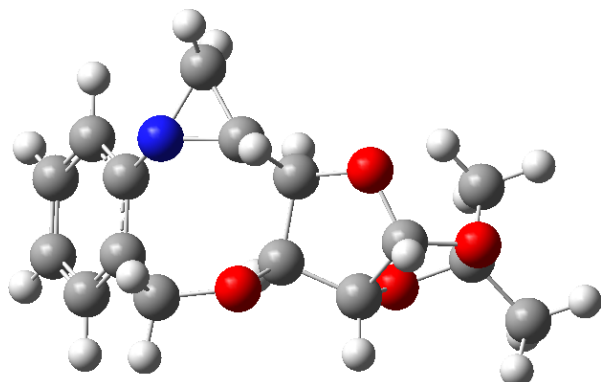

E (Hartree) = -965.39916197

Standard orientation:

| -----  |        |        |                         |           |           |  |
|--------|--------|--------|-------------------------|-----------|-----------|--|
| Center | Atomic | Atomic | Coordinates (Angstroms) |           |           |  |
| Number | Number | Type   | X                       | Y         | Z         |  |
| -----  |        |        |                         |           |           |  |
| 1      | 6      | 0      | 4.030076                | -0.992586 | 1.621883  |  |
| 2      | 6      | 0      | 3.867745                | -2.059488 | 0.759855  |  |
| 3      | 6      | 0      | 3.137063                | -1.881933 | -0.403386 |  |
| 4      | 6      | 0      | 2.575407                | -0.658520 | -0.718237 |  |
| 5      | 6      | 0      | 2.725968                | 0.411198  | 0.168339  |  |
| 6      | 6      | 0      | 3.459342                | 0.233719  | 1.331423  |  |
| 7      | 6      | 0      | 1.824502                | -0.461259 | -2.015075 |  |
| 8      | 8      | 0      | 0.417429                | -0.106397 | -1.873649 |  |
| 9      | 6      | 0      | -0.225924               | -0.345241 | -0.622577 |  |
| 10     | 6      | 0      | -0.268684               | 0.959859  | 0.207450  |  |
| 11     | 6      | 0      | 0.750122                | 1.965027  | -0.262884 |  |
| 12     | 7      | 0      | 2.181490                | 1.650714  | -0.182221 |  |
| 13     | 6      | 0      | -1.681335               | -0.621509 | -0.910620 |  |

|    |   |   |           |           |           |
|----|---|---|-----------|-----------|-----------|
| 14 | 6 | 0 | -2.371418 | 0.744759  | -0.923025 |
| 15 | 8 | 0 | -1.567511 | 1.560989  | -0.064069 |
| 16 | 8 | 0 | -2.248953 | -1.213542 | 0.280831  |
| 17 | 6 | 0 | -3.521198 | -0.592253 | 0.596642  |
| 18 | 8 | 0 | -3.638563 | 0.492588  | -0.353985 |
| 19 | 6 | 0 | 1.632671  | 2.651067  | 0.741764  |
| 20 | 6 | 0 | -3.463150 | -0.050571 | 2.009621  |
| 21 | 6 | 0 | -4.652625 | -1.564946 | 0.341078  |
| 22 | 1 | 0 | 0.219495  | -1.156610 | -0.075204 |
| 23 | 1 | 0 | -0.195348 | 0.748221  | 1.262004  |
| 24 | 1 | 0 | 0.453643  | 2.480741  | -1.148670 |
| 25 | 1 | 0 | 3.007071  | -2.704676 | -1.079948 |
| 26 | 1 | 0 | 3.593424  | 1.060869  | 1.998105  |
| 27 | 1 | 0 | 2.268164  | 0.350106  | -2.571292 |
| 28 | 1 | 0 | 1.880519  | -1.367089 | -2.602749 |
| 29 | 1 | 0 | -1.842696 | -1.222252 | -1.787880 |
| 30 | 1 | 0 | -2.503906 | 1.211246  | -1.879191 |
| 31 | 1 | 0 | 1.961662  | 3.656648  | 0.579076  |
| 32 | 1 | 0 | 1.500682  | 2.363552  | 1.768645  |
| 33 | 1 | 0 | -2.695206 | 0.705532  | 2.061232  |
| 34 | 1 | 0 | -3.239782 | -0.852781 | 2.700099  |
| 35 | 1 | 0 | -4.413122 | 0.397308  | 2.269201  |
| 36 | 1 | 0 | -4.606358 | -1.911155 | -0.682542 |
| 37 | 1 | 0 | -5.601477 | -1.071735 | 0.501999  |
| 38 | 1 | 0 | -4.566147 | -2.412858 | 1.007144  |
| 39 | 1 | 0 | 4.597074  | -1.110420 | 2.524018  |
| 40 | 1 | 0 | 4.301283  | -3.012692 | 0.984977  |

-----

### Optimized coordinates for cis-9b

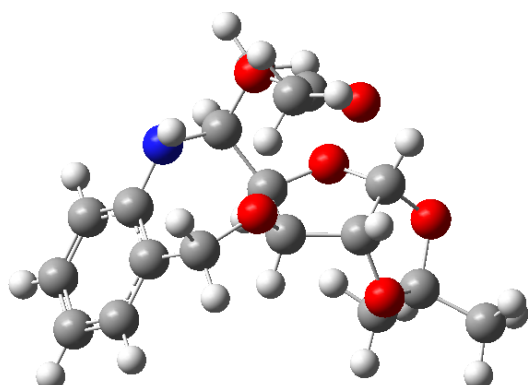

E (Hartree) = -1206.19200639

Standard orientation:

| -----  |        |        |                         |           |           |  |
|--------|--------|--------|-------------------------|-----------|-----------|--|
| Center | Atomic | Atomic | Coordinates (Angstroms) |           |           |  |
| Number | Number | Type   | X                       | Y         | Z         |  |
| -----  |        |        |                         |           |           |  |
| 1      | 6      | 0      | 0.000000                | 0.000000  | 0.000000  |  |
| 2      | 6      | 0      | 0.000000                | 0.000000  | 1.383973  |  |
| 3      | 6      | 0      | 1.202770                | 0.000000  | 2.065303  |  |
| 4      | 6      | 0      | 2.408176                | 0.005088  | 1.380878  |  |
| 5      | 6      | 0      | 2.406806                | 0.020127  | -0.012684 |  |
| 6      | 6      | 0      | 1.197167                | 0.015800  | -0.689432 |  |
| 7      | 6      | 0      | 3.715362                | -0.021561 | 2.148508  |  |
| 8      | 8      | 0      | 4.700790                | -0.925570 | 1.588170  |  |
| 9      | 6      | 0      | 4.207806                | -2.238352 | 1.272161  |  |
| 10     | 6      | 0      | 3.927984                | -2.440240 | -0.237876 |  |
| 11     | 6      | 0      | 4.173100                | -1.253220 | -1.203796 |  |
| 12     | 7      | 0      | 3.621705                | 0.034566  | -0.751320 |  |
| 13     | 6      | 0      | 5.210341                | -3.328738 | 1.658558  |  |

|    |   |   |           |           |           |
|----|---|---|-----------|-----------|-----------|
| 14 | 6 | 0 | 5.623844  | -4.046710 | 0.354598  |
| 15 | 8 | 0 | 4.764697  | -3.540702 | -0.673681 |
| 16 | 8 | 0 | 4.525313  | -4.349595 | 2.420929  |
| 17 | 6 | 0 | 4.469599  | -5.594062 | 1.685852  |
| 18 | 8 | 0 | 5.402631  | -5.419281 | 0.605567  |
| 19 | 6 | 0 | 5.639021  | -1.017412 | -1.589763 |
| 20 | 6 | 0 | 3.069088  | -5.816125 | 1.145062  |
| 21 | 6 | 0 | 4.970892  | -6.711734 | 2.574077  |
| 22 | 1 | 0 | 3.309224  | -2.430207 | 1.834669  |
| 23 | 1 | 0 | 2.900521  | -2.748452 | -0.356451 |
| 24 | 1 | 0 | 3.685898  | -1.543758 | -2.126739 |
| 25 | 1 | 0 | 1.205372  | -0.018060 | 3.138555  |
| 26 | 1 | 0 | 1.215247  | 0.044166  | -1.759652 |
| 27 | 1 | 0 | 4.191676  | 0.949567  | 2.139948  |
| 28 | 1 | 0 | 3.522454  | -0.298799 | 3.177482  |
| 29 | 1 | 0 | 6.039087  | -2.934721 | 2.213618  |
| 30 | 1 | 0 | 6.641617  | -3.907186 | 0.068040  |
| 31 | 1 | 0 | 6.164184  | -1.951275 | -1.657385 |
| 32 | 1 | 0 | 5.673120  | -0.486120 | -2.525814 |
| 33 | 1 | 0 | 2.814308  | -5.025211 | 0.455048  |
| 34 | 1 | 0 | 2.358652  | -5.829272 | 1.960585  |
| 35 | 1 | 0 | 3.029378  | -6.756813 | 0.612525  |
| 36 | 1 | 0 | 5.966870  | -6.467311 | 2.915123  |
| 37 | 1 | 0 | 5.002922  | -7.637606 | 2.016228  |
| 38 | 1 | 0 | 4.318048  | -6.823926 | 3.429242  |
| 39 | 1 | 0 | -0.926916 | -0.001649 | -0.538186 |
| 40 | 1 | 0 | -0.924279 | -0.007307 | 1.925991  |
| 41 | 8 | 0 | 6.303871  | -0.122669 | -0.649554 |
| 42 | 6 | 0 | 7.124724  | -0.600192 | 0.308690  |
| 43 | 8 | 0 | 7.421769  | -1.765766 | 0.396407  |



|    |   |   |          |          |           |
|----|---|---|----------|----------|-----------|
| 44 | 6 | 0 | 7.601310 | 0.502857 | 1.202389  |
| 45 | 1 | 0 | 7.813393 | 1.387804 | 0.621409  |
| 46 | 1 | 0 | 6.803238 | 0.723675 | 1.899882  |
| 47 | 1 | 0 | 8.473157 | 0.178839 | 1.748593  |
| 48 | 1 | 0 | 4.350677 | 0.564103 | -0.313250 |

-----

### Optimized coordinates for trans-9b

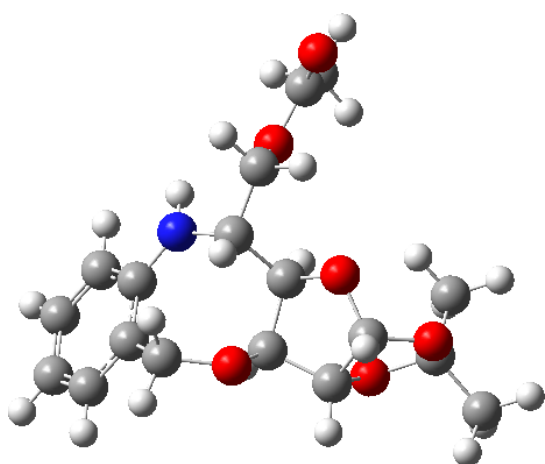

E (Hartree) = -1206.19200639

Standard orientation:

-----

| Center | Atomic | Atomic | Coordinates (Angstroms) |          |          |
|--------|--------|--------|-------------------------|----------|----------|
| Number | Number | Type   | X                       | Y        | Z        |
| 1      | 6      | 0      | 0.000000                | 0.000000 | 0.000000 |
| 2      | 6      | 0      | 0.000000                | 0.000000 | 1.384847 |
| 3      | 6      | 0      | 1.212621                | 0.000000 | 2.038683 |
| 4      | 6      | 0      | 2.426597                | 0.006826 | 1.360964 |

-----

|    |   |   |          |           |           |
|----|---|---|----------|-----------|-----------|
| 5  | 6 | 0 | 2.426137 | -0.020708 | -0.040452 |
| 6  | 6 | 0 | 1.186155 | -0.017207 | -0.693634 |
| 7  | 6 | 0 | 3.693711 | 0.094864  | 2.180258  |
| 8  | 8 | 0 | 4.558809 | -1.077077 | 2.173440  |
| 9  | 6 | 0 | 4.288905 | -2.176345 | 1.295057  |
| 10 | 6 | 0 | 4.955310 | -1.936040 | -0.064301 |
| 11 | 6 | 0 | 4.912971 | -0.480276 | -0.504637 |
| 12 | 7 | 0 | 3.557491 | -0.053087 | -0.840200 |
| 13 | 6 | 0 | 5.123901 | -3.296914 | 1.865315  |
| 14 | 6 | 0 | 6.545936 | -2.993930 | 1.377186  |
| 15 | 8 | 0 | 6.361882 | -2.243601 | 0.173859  |
| 16 | 8 | 0 | 4.817648 | -4.503465 | 1.132867  |
| 17 | 6 | 0 | 6.041931 | -5.190044 | 0.764074  |
| 18 | 8 | 0 | 7.097684 | -4.272692 | 1.130068  |
| 19 | 6 | 0 | 5.769127 | -0.283080 | -1.744622 |
| 20 | 6 | 0 | 6.042597 | -5.419834 | -0.732940 |
| 21 | 6 | 0 | 6.201286 | -6.448135 | 1.591277  |
| 22 | 1 | 0 | 3.242446 | -2.414250 | 1.225044  |
| 23 | 1 | 0 | 4.555350 | -2.586477 | -0.820572 |
| 24 | 1 | 0 | 5.353930 | 0.101669  | 0.285353  |
| 25 | 1 | 0 | 1.231232 | 0.005185  | 3.111563  |
| 26 | 1 | 0 | 1.172072 | -0.028499 | -1.765988 |
| 27 | 1 | 0 | 4.288933 | 0.933546  | 1.850381  |
| 28 | 1 | 0 | 3.430107 | 0.262430  | 3.213493  |
| 29 | 1 | 0 | 5.021543 | -3.419642 | 2.928590  |
| 30 | 1 | 0 | 7.184730 | -2.462409 | 2.052519  |
| 31 | 1 | 0 | 5.777506 | 0.750503  | -2.054250 |
| 32 | 1 | 0 | 6.769811 | -0.634885 | -1.570057 |
| 33 | 1 | 0 | 6.034929 | -4.464020 | -1.234522 |
| 34 | 1 | 0 | 5.169175 | -5.991721 | -1.016164 |

|    |   |   |           |           |           |
|----|---|---|-----------|-----------|-----------|
| 35 | 1 | 0 | 6.936854  | -5.956826 | -1.019810 |
| 36 | 1 | 0 | 6.173819  | -6.194782 | 2.642445  |
| 37 | 1 | 0 | 7.151316  | -6.914123 | 1.368166  |
| 38 | 1 | 0 | 5.397309  | -7.137568 | 1.371315  |
| 39 | 1 | 0 | -0.925872 | 0.004552  | -0.540703 |
| 40 | 1 | 0 | -0.917969 | 0.002112  | 1.935867  |
| 41 | 8 | 0 | 5.140369  | -1.089143 | -2.789565 |
| 42 | 6 | 0 | 5.782408  | -1.228865 | -3.978556 |
| 43 | 8 | 0 | 6.820312  | -0.671644 | -4.213144 |
| 44 | 6 | 0 | 5.015252  | -2.143553 | -4.888139 |
| 45 | 1 | 0 | 4.917580  | -3.114291 | -4.418597 |
| 46 | 1 | 0 | 4.019425  | -1.747991 | -5.042896 |
| 47 | 1 | 0 | 5.531189  | -2.234991 | -5.830284 |
| 48 | 1 | 0 | 3.371168  | -0.156081 | -1.816843 |

-----
